# Supplementary material
Source: PubMed Central journal article supplement (PMC11018019)
Supplement: CJAS_A_2189771_SM3245.pdf [file CJAS_A_2189771_SM3245.pdf]

Supplementary material for the paper:  
 Distribution-free Phase II triple EWMA control  
 chart for joint monitoring the process location and  
 scale parameters

Vasileios Alevizakos<sup>1</sup>, Kashinath Chatterjee<sup>2</sup>, and Christos  
 Koukouvinos <sup>\*1</sup>

<sup>1</sup>Department of Mathematics, National Technical University of Athens,  
 Zografou, 15773, Athens, Greece

<sup>2</sup>Department of Population Health Sciences, Division of Biostatistics  
 and Data Science, Augusta University, Augusta, GA 30912-4900

In the following lines, we compute the IC variance of the  $TL_j$  statistic.

The charting statistic  $TL_j$  is written as

$$TL_j = \frac{\lambda^3}{2} \sum_{i=1}^j (1-\lambda)^{j-i} (j-i+1)(j-i+2)L_j + (1-\lambda)^j [\lambda j(\lambda j + \lambda + 2) + 2].$$

Thus, we get

$$E(TL_j | \mathbf{X}_m, IC) = \frac{\lambda^3}{2} \sum_{i=1}^j (1-\lambda)^{j-i} (j-i+1)(j-i+2)E(L_j | \mathbf{X}_m, IC) + (1-\lambda)^j [\lambda j(\lambda j + \lambda + 2) + 2]$$

and

$$Var(TL_j | \mathbf{X}_m, IC) = \frac{\lambda^6}{4} \sum_{i=1}^j (1-\lambda)^{2(j-i)} (j-i+1)^2 (j-i+2)^2 Var(L_j | \mathbf{X}_m, IC).$$

---

<sup>\*</sup>Corresponding author. Email: ckoukouv@math.ntua.gr

It is to be noted that

$$\begin{aligned}
& \frac{\lambda^3}{2} \sum_{i=1}^j (1-\lambda)^{j-i} (j-i+1)(j-i+2) \\
&= \frac{\lambda^3}{2} \sum_{u=1}^j (1-\lambda)^{u-1} u(u+1) = \frac{\lambda^3}{2} \left[ 2 \sum_{u=1}^j u(1-\lambda)^{u-1} + (1-\lambda) \sum_{u=1}^j u(u-1)(1-\lambda)^{u-2} \right] \\
&= \frac{\lambda^3}{2} \left[ 2 \left( \frac{1-(1-\lambda)^{j+1}}{\lambda^2} - \frac{(j+1)(1-\lambda)^j}{\lambda} \right) - (1-\lambda) \left( \frac{j(j+1)(1-\lambda)^{j-1}}{\lambda} + \right. \right. \\
&\quad \left. \left. \frac{2(j+1)(1-\lambda)^j}{\lambda^2} - \frac{2(1-(1-\lambda)^{j+1})}{\lambda^3} \right) \right] \\
&= \lambda - \lambda(1-\lambda)^{j+1} - (j+1)\lambda^2(1-\lambda)^j - \frac{j(j+1)\lambda^2(1-\lambda)^j}{2} - (j+1)\lambda(1-\lambda)^{j+1} + \\
&\quad 1 - \lambda - (1-\lambda)^{j+2} \\
&= 1 - \frac{(1-\lambda)^j}{2} [2\lambda(1-\lambda) + 2(j+1)\lambda^2 + j(j+1)\lambda^2 + 2(j+1)\lambda(1-\lambda) + 2(1-\lambda)^2] \\
&= 1 - \frac{(1-\lambda)^j}{2} [\lambda j(\lambda j + \lambda + 2) + 2].
\end{aligned}$$

Thus,

$$\begin{aligned}
E(TL_j | \mathbf{X}_m, IC) &= \left[ 1 - \frac{(1-\lambda)^j}{2} [\lambda j(\lambda j + \lambda + 2) + 2] \right] E(L_j | \mathbf{X}_m, IC) + \\
&\quad (1-\lambda)^j [\lambda j(\lambda j + \lambda + 2) + 2].
\end{aligned}$$

Taking  $d = (1 - \lambda)^2$ , we have

$$\begin{aligned}
& \sum_{i=1}^j (1 - \lambda)^{2(j-i)} (j - i + 1)^2 (j - i + 2)^2 = \sum_{u=1}^j u^2 (u + 1)^2 d^{u-1} = \sum_{u=1}^j (u^4 + 2u^3 + u^2) d^{u-1} \\
&= \sum_{u=1}^j u(u-1)(u-2)(u-3) d^{u-1} + 8 \sum_{u=1}^j u(u-1)(u-2) d^{u-1} + 14 \sum_{u=1}^j u(u-1) d^{u-1} + \\
& \quad 4 \sum_{u=1}^j u d^{u-1} \\
&= d^3 \sum_{u=1}^j u(u-1)(u-2)(u-3) d^{u-4} + 8d^2 \sum_{u=1}^j u(u-1)(u-2) d^{u-3} + 14d \sum_{u=1}^j u(u-1) d^{u-2} + \\
& \quad 4 \sum_{u=1}^j u d^{u-1} \\
&= d^3 \left[ -\frac{j(j^2-1)(j-2)d^{j-3}}{1-d} - \frac{4j(j^2-1)d^{j-2}}{(1-d)^2} - \frac{12j(j+1)d^{j-1}}{(1-d)^3} - \frac{24(j+1)d^j}{(1-d)^4} + \right. \\
& \quad \left. \frac{24(1-d^{j+1})}{(1-d)^5} \right] + 8d^2 \left[ -\frac{j(j^2-1)d^{j-2}}{1-d} - \frac{3j(j+1)d^{j-1}}{(1-d)^2} - \frac{6(j+1)d^j}{(1-d)^3} + \right. \\
& \quad \left. \frac{6(1-d^{j+1})}{(1-d)^4} \right] + 14d \left[ -\frac{j(j+1)d^{j-1}}{1-d} - \frac{2(j+1)d^j}{(1-d)^2} + \frac{2(1-d^{j+1})}{(1-d)^3} \right] + \\
& \quad 4 \left[ \frac{1-d^{j+1}}{(1-d)^2} - \frac{(j+1)d^j}{1-d} \right].
\end{aligned}$$

Therefore

$$\begin{aligned}
Var(TL_j | \mathbf{X}_m, IC) &= \left[ \frac{d^3 \lambda^6}{4} \left[ -\frac{j(j^2-1)(j-2)d^{j-3}}{1-d} - \frac{4j(j^2-1)d^{j-2}}{(1-d)^2} - \frac{12j(j+1)d^{j-1}}{(1-d)^3} - \right. \right. \\
& \quad \left. \frac{24(j+1)d^j}{(1-d)^4} + \frac{24(1-d^{j+1})}{(1-d)^5} \right] + 2d^2 \lambda^6 \left[ -\frac{j(j^2-1)d^{j-2}}{1-d} - \right. \\
& \quad \left. \frac{3j(j+1)d^{j-1}}{(1-d)^2} - \frac{6(j+1)d^j}{(1-d)^3} + \frac{6(1-d^{j+1})}{(1-d)^4} \right] + \\
& \quad \frac{7d\lambda^6}{2} \left[ -\frac{j(j+1)d^{j-1}}{1-d} - \frac{2(j+1)d^j}{(1-d)^2} + \frac{2(1-d^{j+1})}{(1-d)^3} \right] + \\
& \quad \left. \lambda^6 \left[ \frac{1-d^{j+1}}{(1-d)^2} - \frac{(j+1)d^j}{1-d} \right] \right] Var(L_j | \mathbf{X}_m, IC).
\end{aligned}$$

From the above equations, we have that the IC variance of the  $TL_j$  statistic is

$$\begin{aligned}
Var(TL_j | IC) &= E[Var(TL_j | \mathbf{X}_m, IC)] + Var[E(TL_j | \mathbf{X}_m, IC)] \\
&= K_{T_j} \xi_1 + \left[ 1 - \frac{(1-\lambda)^j}{2} [\lambda j(\lambda j + \lambda + 2) + 2] \right]^2 \xi_2,
\end{aligned}$$

where

$$\begin{aligned}
K_{T_j} = & \left[ \frac{d^3 \lambda^6}{4} \left[ -\frac{j(j^2-1)(j-2)d^{j-3}}{1-d} - \frac{4j(j^2-1)d^{j-2}}{(1-d)^2} - \frac{12j(j+1)d^{j-1}}{(1-d)^3} - \right. \right. \\
& \left. \frac{24(j+1)d^j}{(1-d)^4} + \frac{24(1-d^{j+1})}{(1-d)^5} \right] + 2d^2 \lambda^6 \left[ -\frac{j(j^2-1)d^{j-2}}{1-d} - \right. \\
& \left. \frac{3j(j+1)d^{j-1}}{(1-d)^2} - \frac{6(j+1)d^j}{(1-d)^3} + \frac{6(1-d^{j+1})}{(1-d)^4} \right] + \\
& \frac{7d\lambda^6}{2} \left[ -\frac{j(j+1)d^{j-1}}{1-d} - \frac{2(j+1)d^j}{(1-d)^2} + \frac{2(1-d^{j+1})}{(1-d)^3} \right] + \\
& \lambda^6 \left[ \frac{1-d^{j+1}}{(1-d)^2} - \frac{(j+1)d^j}{1-d} \right].
\end{aligned}$$

Table S1: IC run-length characteristics of the TL control chart when  $ARL_0 \approx 500$

| $m$ | $n$ | $\lambda = 0.05$  | time-varying UCL  |                    |                     |                     |                     | steady-state UCL    |                     |  |  |  |
|-----|-----|-------------------|-------------------|--------------------|---------------------|---------------------|---------------------|---------------------|---------------------|--|--|--|
|     |     |                   | 0.10              | 0.25               | 0.50                | 0.05                | 0.10                | 0.25                | 0.50                |  |  |  |
| 100 | 5   | 500.37 (1560.69)  | 498.53 (1251.60)  | 501.05 (953.59)    | 501.90 (811.95)     | 500.82 (1340.46)    | 500.66 (1133.47)    | 500.84 (922.71)     | 500.66 (800.83)     |  |  |  |
|     | 10  | 1,365,329,2185    | 1,26,140,445,2040 | 3,68,210,547,1882  | 11,88,243,576,1853  | 25,56,150,404,1873  | 22,70,184,472,1872  | 18,85,224,547,1831  | 17,93,246,576,1829  |  |  |  |
|     | 15  | 498.99 (1670.61)  | 499.52 (1335.75)  | 500.93 (1008.15)   | 500.14 (841.89)     | 499.66 (1404.68)    | 500.99 (1202.82)    | 499.35 (956.12)     | 500.75 (825.33)     |  |  |  |
| 100 | 5   | 1,2,35,266,2198   | 1,13,110,408,2110 | 1,54,188,523,1971  | 9,77,232,584,1871   | 20,42,122,368,1991  | 19,58,165,451,1923  | 16,72,206,527,1908  | 15,83,237,585,1866  |  |  |  |
|     | 10  | 501.09 (1797.40)  | 500.76 (1435.23)  | 500.17 (1072.17)   | 499.40 (885.08)     | 499.53 (1520.16)    | 499.84 (1242.44)    | 499.56 (1010.59)    | 499.59 (868.43)     |  |  |  |
|     | 15  | 1,1,15,190,2289   | 1,6,74,364,2207   | 1,39,159,504,2044  | 7,65,209,561,1927   | 13,26,82,319,2110   | 16,44,138,427,2054  | 13,59,181,515,1979  | 12,72,215,562,1904  |  |  |  |
| 300 | 5   | 500.44 (987.63)   | 499.83 (789.49)   | 499.91 (673.52)    | 500.77 (618.65)     | 500.30 (795.96)     | 499.55 (700.84)     | 499.59 (653.84)     | 500.01 (606.75)     |  |  |  |
|     | 10  | 1,27,186,550,1947 | 1,71,243,609,1817 | 8,101,284,640,1697 | 17,117,304,662,1622 | 38,105,252,566,1743 | 30,113,275,611,1698 | 24,116,291,633,1658 | 23,123,307,661,1599 |  |  |  |
|     | 15  | 499.96 (998.59)   | 500.08 (826.42)   | 499.91 (661.54)    | 499.87 (606.27)     | 499.71 (804.93)     | 500.55 (722.27)     | 499.86 (633.49)     | 499.62 (594.98)     |  |  |  |
| 300 | 5   | 1,20,175,559,2015 | 1,64,233,605,1870 | 6,97,277,643,1720  | 16,113,295,654,1668 | 37,101,247,568,1779 | 29,107,269,607,1734 | 25,112,287,640,1698 | 22,119,298,652,1652 |  |  |  |
|     | 10  | 500.75 (1060.92)  | 500.06 (848.28)   | 500.98 (685.67)    | 500.69 (624.47)     | 499.96 (841.92)     | 500.97 (754.95)     | 500.48 (655.11)     | 500.21 (614.82)     |  |  |  |
|     | 15  | 1,14,152,528,2100 | 1,56,224,591,1921 | 5,94,274,633,1731  | 15,108,298,655,1688 | 35,93,236,561,1772  | 29,102,262,598,1747 | 23,110,283,631,1682 | 22,115,301,649,1678 |  |  |  |

Table S2: Performance of the TL, DL and EL control charts under the  $N(\theta, \delta)$  distribution with a time-varying UCL when  $m = 100$ ,  $n = 5$  and  $ARL_0 \approx 500$

| $\theta$        | TL                              |                     |                    |                    | DL                         |                    | EL                  |                    |
|-----------------|---------------------------------|---------------------|--------------------|--------------------|----------------------------|--------------------|---------------------|--------------------|
|                 | $\lambda = 0.05$<br>$L = 0.648$ | 0.10                | 0.25               | 0.50               | 0.05                       | 0.25               | 0.05                | 0.25               |
| $\delta = 1$    |                                 |                     |                    |                    |                            |                    |                     |                    |
| 0               | 500.37<br>(1560.69)             | 498.53<br>(1251.60) | 501.05<br>(953.59) | 501.90<br>(811.95) | 501.24<br>(1462.29)        | 500.06<br>(910.02) | 498.15<br>(1211.95) | 501.96<br>(824.66) |
| 0.1             | 403.85<br>(1394.06)             | 407.54<br>(1062.86) | 425.40<br>(847.90) | 433.63<br>(727.79) | <b>394.76</b><br>(1236.13) | 424.55<br>(789.98) | 414.23<br>(1076.23) | 435.15<br>(718.18) |
| 0.25            | <b>137.54</b><br>(664.63)       | 162.34<br>(562.25)  | 196.58<br>(479.48) | 215.86<br>(399.16) | 143.83<br>(615.63)         | 196.26<br>(431.52) | 164.06<br>(543.13)  | 215.78<br>(396.93) |
| 0.5             | <b>12.46</b><br>(32.33)         | 18.20<br>(38.93)    | 27.66<br>(57.81)   | 38.03<br>(72.38)   | 13.14<br>(32.29)           | 29.24<br>(60.92)   | 18.48<br>(54.67)    | 40.49<br>(92.94)   |
| 1               | <b>1.74</b><br>(1.73)           | 2.32<br>(2.42)      | 2.97<br>(2.75)     | 3.56<br>(3.35)     | 1.82<br>(1.64)             | 3.00<br>(2.71)     | 2.34<br>(2.03)      | 3.84<br>(3.78)     |
| 1.5             | <b>1.09</b><br>(0.36)           | 1.16<br>(0.50)      | 1.31<br>(0.71)     | 1.46<br>(0.83)     | 1.11<br>(0.38)             | 1.33<br>(0.71)     | 1.23<br>(0.53)      | 1.53<br>(0.86)     |
| 2               | <b>1.01</b><br>(0.09)           | 1.02<br>(0.14)      | 1.04<br>(0.22)     | 1.08<br>(0.29)     | <b>1.01</b><br>(0.11)      | 1.05<br>(0.24)     | 1.03<br>(0.19)      | 1.10<br>(0.33)     |
| $\delta = 1.1$  |                                 |                     |                    |                    |                            |                    |                     |                    |
| 0               | <b>130.64</b><br>(491.64)       | 161.14<br>(445.34)  | 192.67<br>(353.80) | 212.19<br>(343.28) | 136.94<br>(475.71)         | 198.78<br>(370.14) | 156.47<br>(413.91)  | 210.27<br>(331.50) |
| 0.1             | <b>111.26</b><br>(459.40)       | 135.20<br>(355.42)  | 168.83<br>(341.24) | 190.07<br>(314.48) | 115.63<br>(417.28)         | 172.38<br>(318.04) | 133.58<br>(358.78)  | 188.18<br>(307.66) |
| 0.25            | <b>49.42</b><br>(185.20)        | 65.33<br>(163.33)   | 89.68<br>(187.38)  | 108.36<br>(192.95) | 52.68<br>(180.87)          | 93.67<br>(186.96)  | 63.82<br>(151.52)   | 109.62<br>(201.96) |
| 0.5             | <b>9.87</b><br>(17.77)          | 14.10<br>(24.64)    | 20.05<br>(33.52)   | 26.81<br>(44.84)   | 10.32<br>(19.38)           | 21.52<br>(35.88)   | 13.53<br>(24.13)    | 27.12<br>(40.32)   |
| 1               | <b>1.85</b><br>(1.90)           | 2.39<br>(2.43)      | 3.13<br>(2.95)     | 3.63<br>(3.39)     | 1.93<br>(1.79)             | 3.13<br>(2.88)     | 2.40<br>(2.11)      | 3.85<br>(3.65)     |
| 1.5             | <b>1.12</b><br>(0.42)           | 1.21<br>(0.59)      | 1.38<br>(0.82)     | 1.55<br>(0.92)     | 1.15<br>(0.45)             | 1.42<br>(0.80)     | 1.28<br>(0.60)      | 1.63<br>(0.96)     |
| 2               | <b>1.01</b><br>(0.13)           | 1.03<br>(0.18)      | 1.07<br>(0.28)     | 1.11<br>(0.36)     | 1.02<br>(0.15)             | 1.08<br>(0.30)     | 1.05<br>(0.23)      | 1.14<br>(0.40)     |
| $\delta = 1.25$ |                                 |                     |                    |                    |                            |                    |                     |                    |
| 0               | <b>26.28</b><br>(61.09)         | 36.91<br>(68.80)    | 52.79<br>(88.94)   | 67.75<br>(102.19)  | 27.51<br>(59.72)           | 56.06<br>(92.87)   | 35.37<br>(68.45)    | 67.08<br>(98.09)   |
| 0.1             | <b>24.28</b><br>(57.52)         | 34.22<br>(66.44)    | 47.98<br>(78.49)   | 61.77<br>(92.10)   | 25.36<br>(53.23)           | 50.67<br>(81.35)   | 32.34<br>(58.85)    | 61.79<br>(88.72)   |
| 0.25            | <b>16.73</b><br>(34.26)         | 23.24<br>(40.50)    | 32.49<br>(49.64)   | 42.70<br>(62.85)   | 17.08<br>(34.88)           | 34.67<br>(54.59)   | 21.77<br>(38.00)    | 43.10<br>(60.94)   |
| 0.5             | <b>6.97</b><br>(10.97)          | 9.85<br>(13.59)     | 13.05<br>(17.66)   | 16.66<br>(22.49)   | 6.99<br>(10.56)            | 13.38<br>(18.17)   | 8.88<br>(12.96)     | 16.87<br>(22.06)   |
| 1               | <b>1.95</b><br>(1.98)           | 2.45<br>(2.48)      | 3.19<br>(3.02)     | 3.63<br>(3.33)     | 1.98<br>(1.84)             | 3.17<br>(2.95)     | 2.42<br>(2.14)      | 3.81<br>(3.50)     |
| 1.5             | <b>1.16</b><br>(0.50)           | 1.28<br>(0.73)      | 1.50<br>(0.92)     | 1.66<br>(1.06)     | 1.20<br>(0.53)             | 1.52<br>(90.93)    | 1.35<br>(0.70)      | 1.74<br>(1.09)     |
| 2               | <b>1.03</b><br>(0.18)           | 1.05<br>(0.26)      | 1.11<br>(0.37)     | 1.17<br>(0.45)     | 1.04<br>(0.21)             | 1.13<br>(0.38)     | 1.09<br>(0.31)      | 1.20<br>(0.49)     |

Table S2: continued

| $\theta$       | TL                              |                  |                  |                  | DL                     |                  | EL               |                  |
|----------------|---------------------------------|------------------|------------------|------------------|------------------------|------------------|------------------|------------------|
|                | $\lambda = 0.05$<br>$L = 0.648$ | 0.10             | 0.25             | 0.50             | 0.05                   | 0.25             | 0.05             | 0.25             |
| $\delta = 1.5$ |                                 |                  |                  |                  |                        |                  |                  |                  |
| 0              | <b>7.30</b><br>(10.99)          | 10.07<br>(13.05) | 13.56<br>(15.44) | 17.74<br>(21.01) | <b>7.30</b><br>(10.52) | 14.11<br>(17.07) | 8.82<br>(11.54)  | 18.49<br>(22.44) |
| 0.1            | <b>7.04</b><br>(10.44)          | 9.74<br>(12.22)  | 13.18<br>(15.02) | 17.36<br>(20.53) | 7.05<br>(9.94)         | 13.63<br>(16.14) | 11.30<br>(11.30) | 21.61<br>(21.61) |
| 0.25           | <b>6.14</b><br>(8.88)           | 8.34<br>(10.44)  | 11.39<br>(12.83) | 14.42<br>(16.67) | 6.21<br>(8.58)         | 11.66<br>(13.57) | 7.46<br>(9.30)   | 14.90<br>(17.21) |
| 0.5            | 4.32<br>(5.99)                  | 5.86<br>(7.04)   | 7.67<br>(8.42)   | 9.12<br>(10.10)  | <b>4.29</b><br>(5.51)  | 7.65<br>(8.51)   | 5.17<br>(5.96)   | 9.29<br>(10.22)  |
| 1              | <b>1.92</b><br>(1.88)           | 2.38<br>(2.38)   | 3.04<br>(2.81)   | 3.50<br>(3.15)   | 1.93<br>(1.71)         | 3.02<br>(2.69)   | 2.35<br>(2.02)   | 3.81<br>(3.50)   |
| 1.5            | <b>1.24</b><br>(0.67)           | 1.39<br>(0.92)   | 1.63<br>(1.15)   | 1.82<br>(1.22)   | 1.27<br>(0.67)         | 1.65<br>(1.08)   | 1.45<br>(0.83)   | 1.74<br>(1.09)   |
| 2              | <b>1.06</b><br>(0.27)           | 1.10<br>(0.38)   | 1.18<br>(0.51)   | 1.27<br>(0.60)   | 1.07<br>(0.30)         | 1.20<br>(0.50)   | 1.14<br>(0.40)   | 1.32<br>(0.63)   |
| $\delta = 2$   |                                 |                  |                  |                  |                        |                  |                  |                  |
| 0              | <b>2.53</b><br>(2.99)           | 3.30<br>(3.66)   | 4.37<br>(4.16)   | 5.22<br>(4.89)   | 2.58<br>(2.82)         | 4.36<br>(4.11)   | 3.06<br>(2.90)   | 5.47<br>(4.96)   |
| 0.1            | <b>2.52</b><br>(2.94)           | 3.29<br>(3.59)   | 4.36<br>(4.15)   | 5.20<br>(4.78)   | 2.54<br>(2.71)         | 4.35<br>(4.09)   | 3.05<br>(2.90)   | 5.46<br>(4.97)   |
| 0.25           | <b>2.44</b><br>(2.81)           | 3.23<br>(3.51)   | 4.23<br>(4.00)   | 5.01<br>(4.62)   | 2.45<br>(2.54)         | 4.20<br>(3.91)   | 3.01<br>(2.83)   | 5.20<br>(4.75)   |
| 0.5            | <b>2.21</b><br>(2.43)           | 2.87<br>(3.09)   | 3.71<br>(3.50)   | 4.36<br>(3.91)   | 2.23<br>(2.27)         | 3.69<br>(3.36)   | 2.72<br>(2.46)   | 4.51<br>(3.99)   |
| 1              | <b>1.64</b><br>(1.43)           | 1.97<br>(1.80)   | 2.49<br>(2.14)   | 2.85<br>(2.29)   | 1.67<br>(1.31)         | 2.49<br>(2.03)   | 1.98<br>(1.47)   | 2.95<br>(2.35)   |
| 1.5            | <b>1.29</b><br>(0.78)           | 1.45<br>(1.01)   | 1.71<br>(1.24)   | 1.92<br>(1.32)   | 1.31<br>(0.74)         | 1.73<br>(1.17)   | 1.50<br>(0.88)   | 1.99<br>(1.31)   |
| 2              | <b>1.11</b><br>(0.41)           | 1.18<br>(0.54)   | 1.33<br>(0.73)   | 1.45<br>(0.81)   | 1.13<br>(0.42)         | 1.35<br>(0.71)   | 1.24<br>(0.55)   | 1.50<br>(0.82)   |

Table S3: Performance of the TL, DL and EL control charts under the  $N(\theta, \delta)$  distribution with a steady-state UCL when  $m = 100$ ,  $n = 5$  and  $ARL_0 \approx 500$

| $\theta$        | TL                              |                     |                    |                    | DL                  |                    | EL                  |                    |
|-----------------|---------------------------------|---------------------|--------------------|--------------------|---------------------|--------------------|---------------------|--------------------|
|                 | $\lambda = 0.05$<br>$L = 0.500$ | 0.10                | 0.25               | 0.50               | 0.05                | 0.25               | 0.05                | 0.25               |
| $\delta = 1$    |                                 |                     |                    |                    |                     |                    |                     |                    |
| 0               | 500.82<br>(1340.46)             | 500.66<br>(1133.47) | 500.84<br>(922.71) | 500.66<br>(800.83) | 499.68<br>(1281.16) | 502.01<br>(891.05) | 503.36<br>(1125.90) | 496.75<br>(798.89) |
| 0.1             | 411.34<br>(1154.74)             | 418.96<br>(993.92)  | 429.48<br>(809.00) | 433.80<br>(716.85) | 408.40<br>(1102.78) | 428.43<br>(766.79) | 420.83<br>(996.09)  | 430.92<br>(703.62) |
| 0.25            | 160.96<br>(546.46)              | 175.38<br>(487.54)  | 203.11<br>(472.56) | 217.92<br>(392.82) | 161.52<br>(525.63)  | 201.58<br>(419.62) | 177.03<br>(499.36)  | 216.35<br>(393.44) |
| 0.5             | 30.26<br>(34.69)                | 29.41<br>(39.92)    | 31.98<br>(57.15)   | 39.91<br>(67.64)   | 25.26<br>(32.85)    | 32.97<br>(61.05)   | 25.51<br>(53.07)    | 41.02<br>(70.21)   |
| 1               | 12.76<br>(2.61)                 | 9.76<br>(2.48)      | 5.99<br>(2.42)     | 4.58<br>(3.21)     | 7.59<br>(2.43)      | 4.72<br>(2.65)     | 4.30<br>(2.66)      | 4.48<br>(3.71)     |
| 1.5             | 9.08<br>(1.18)                  | 6.66<br>(1.06)      | 3.69<br>(0.85)     | 2.25<br>(0.85)     | 4.72<br>(1.01)      | 2.54<br>(0.82)     | 2.05<br>(0.95)      | 1.86<br>(0.99)     |
| 2               | 7.50<br>(0.67)                  | 5.41<br>(0.58)      | 2.89<br>(0.53)     | 1.60<br>(0.55)     | 3.61<br>(0.61)      | 1.88<br>(0.51)     | 1.36<br>(0.53)      | 1.23<br>(0.46)     |
| $\delta = 1.1$  |                                 |                     |                    |                    |                     |                    |                     |                    |
| 0               | 155.31<br>(426.78)              | 175.28<br>(406.05)  | 197.67<br>(344.89) | 214.89<br>(340.26) | 157.69<br>(403.18)  | 203.86<br>(365.31) | 169.05<br>(373.09)  | 210.59<br>(325.24) |
| 0.1             | 137.02<br>(397.90)              | 151.85<br>(326.00)  | 175.39<br>(327.69) | 192.94<br>(313.46) | 134.97<br>(339.94)  | 177.33<br>(310.89) | 146.48<br>(330.95)  | 188.77<br>(303.82) |
| 0.25            | 71.35<br>(146.81)               | 79.59<br>(147.08)   | 94.79<br>(169.42)  | 110.75<br>(191.95) | 69.66<br>(149.88)   | 97.90<br>(171.07)  | 78.94<br>(177.03)   | 110.66<br>(198.49) |
| 0.5             | 26.37<br>(17.06)                | 24.64<br>(22.85)    | 24.57<br>(34.47)   | 28.58<br>(43.54)   | 21.12<br>(20.13)    | 24.71<br>(36.18)   | 19.21<br>(22.58)    | 29.46<br>(47.72)   |
| 1               | 12.85<br>(2.68)                 | 9.85<br>(2.54)      | 6.07<br>(2.56)     | 4.61<br>(3.28)     | 7.65<br>(2.50)      | 4.79<br>(2.70)     | 4.37<br>(2.74)      | 4.51<br>(3.70)     |
| 1.5             | 9.27<br>(1.25)                  | 6.81<br>(1.14)      | 3.80<br>(0.92)     | 2.35<br>(0.93)     | 4.86<br>(1.08)      | 2.63<br>(0.91)     | 2.16<br>(1.03)      | 1.96<br>(1.08)     |
| 2               | 7.66<br>(0.73)                  | 5.54<br>(0.65)      | 2.98<br>(0.57)     | 1.68<br>(0.58)     | 3.73<br>(0.66)      | 1.94<br>(0.55)     | 1.44<br>(0.58)      | 1.29<br>(0.52)     |
| $\delta = 1.25$ |                                 |                     |                    |                    |                     |                    |                     |                    |
| 0               | 46.90<br>(54.30)                | 49.98<br>(64.56)    | 58.06<br>(85.27)   | 67.76<br>(89.59)   | 43.18<br>(57.10)    | 60.10<br>(91.02)   | 45.36<br>(68.43)    | 68.50<br>(97.09)   |
| 0.1             | 44.43<br>(51.99)                | 46.51<br>(57.23)    | 53.53<br>(78.00)   | 64.09<br>(89.81)   | 40.47<br>(55.39)    | 55.11<br>(81.31)   | 41.90<br>(60.75)    | 63.56<br>(88.66)   |
| 0.25            | 35.19<br>(31.25)                | 34.61<br>(36.03)    | 37.39<br>(47.81)   | 44.88<br>(62.72)   | 30.09<br>(32.25)    | 37.90<br>(49.42)   | 29.67<br>(38.89)    | 44.42<br>(62.88)   |
| 0.5             | 22.14<br>(10.93)                | 19.32<br>(11.90)    | 16.85<br>(16.46)   | 18.32<br>(23.09)   | 16.49<br>(10.84)    | 16.22<br>(18.03)   | 13.77<br>(12.98)    | 18.26<br>(23.39)   |
| 1               | 12.85<br>(2.69)                 | 9.86<br>(2.58)      | 6.10<br>(2.61)     | 4.64<br>(3.16)     | 7.67<br>(2.54)      | 4.82<br>(2.73)     | 4.37<br>(2.73)      | 4.42<br>(3.49)     |
| 1.5             | 9.52<br>(1.34)                  | 7.02<br>(1.22)      | 3.94<br>(1.02)     | 2.48<br>(1.06)     | 5.06<br>(1.18)      | 2.75<br>(1.02)     | 2.31<br>(1.14)      | 2.10<br>(1.22)     |
| 2               | 7.91<br>(0.82)                  | 5.73<br>(0.74)      | 3.10<br>(0.62)     | 1.79<br>(0.63)     | 3.90<br>(0.73)      | 2.02<br>(0.60)     | 1.55<br>(0.65)      | 1.39<br>(0.61)     |



Table S3: continued

| $\theta$       | TL               |                  |                  |                  | DL               |                  | EL               |                  |
|----------------|------------------|------------------|------------------|------------------|------------------|------------------|------------------|------------------|
|                | $\lambda = 0.05$ | 0.10             | 0.25             | 0.50             | 0.05             | 0.25             | 0.05             | 0.25             |
|                | $L = 0.500$      | 1.161            | 2.114            | 3.011            | 0.816            | 2.455            | 1.838            | 3.484            |
| $\delta = 1.5$ |                  |                  |                  |                  |                  |                  |                  |                  |
| 0              | 22.82<br>(9.60)  | 19.92<br>(10.96) | 17.55<br>(15.17) | 19.82<br>(21.44) | 17.10<br>(10.19) | 17.09<br>(16.86) | 14.38<br>(12.39) | 19.88<br>(22.15) |
| 0.1            | 22.54<br>(9.35)  | 19.69<br>(10.81) | 17.31<br>(15.40) | 19.28<br>(21.29) | 16.83<br>(9.99)  | 16.93<br>(17.46) | 14.07<br>(12.07) | 19.30<br>(21.53) |
| 0.25           | 21.23<br>(8.51)  | 18.16<br>(9.62)  | 15.32<br>(13.09) | 16.42<br>(17.81) | 15.45<br>(8.88)  | 14.04<br>(12.90) | 12.45<br>(10.54) | 16.61<br>(18.10) |
| 0.5            | 17.86<br>(5.62)  | 14.61<br>(6.14)  | 10.91<br>(7.85)  | 10.56<br>(10.19) | 12.17<br>(5.85)  | 9.83<br>(8.35)   | 8.81<br>(7.07)   | 10.40<br>(10.57) |
| 1              | 12.63<br>(2.59)  | 9.66<br>(2.41)   | 5.91<br>(2.35)   | 4.41<br>(2.82)   | 7.48<br>(2.39)   | 4.62<br>(2.48)   | 4.19<br>(2.56)   | 4.16<br>(3.08)   |
| 1.5            | 9.83<br>(1.46)   | 7.29<br>(1.33)   | 4.13<br>(1.14)   | 2.63<br>(1.19)   | 5.30<br>(1.30)   | 2.92<br>(1.15)   | 2.47<br>(1.27)   | 2.26<br>(1.35)   |
| 2              | 8.27<br>(0.95)   | 6.01<br>(0.86)   | 3.28<br>(0.71)   | 1.93<br>(0.70)   | 4.16<br>(0.84)   | 2.17<br>(0.70)   | 1.71<br>(0.76)   | 1.52<br>(0.74)   |
| $\delta = 2$   |                  |                  |                  |                  |                  |                  |                  |                  |
| 0              | 14.80<br>(3.24)  | 11.51<br>(3.10)  | 7.52<br>(3.36)   | 6.29<br>(4.44)   | 9.29<br>(3.15)   | 6.34<br>(3.95)   | 5.84<br>(3.65)   | 6.20<br>(4.78)   |
| 0.1            | 14.76<br>(3.23)  | 11.49<br>(3.09)  | 7.50<br>(3.34)   | 6.22<br>(4.30)   | 9.27<br>(3.15)   | 6.31<br>(3.85)   | 5.81<br>(3.59)   | 6.17<br>(4.76)   |
| 0.25           | 14.54<br>(3.17)  | 11.30<br>(3.01)  | 7.32<br>(3.20)   | 6.05<br>(4.19)   | 9.09<br>(3.08)   | 6.13<br>(3.69)   | 5.65<br>(3.49)   | 5.92<br>(4.51)   |
| 0.5            | 13.81<br>(2.88)  | 10.67<br>(2.74)  | 6.79<br>(2.89)   | 5.39<br>(3.63)   | 8.47<br>(2.78)   | 5.50<br>(3.14)   | 5.07<br>(3.07)   | 5.21<br>(3.86)   |
| 1              | 11.81<br>(2.11)  | 8.96<br>(1.97)   | 5.36<br>(1.86)   | 3.80<br>(2.15)   | 6.83<br>(1.96)   | 4.06<br>(1.96)   | 3.63<br>(2.06)   | 3.50<br>(2.41)   |
| 1.5            | 10.04<br>(1.50)  | 7.48<br>(1.38)   | 4.27<br>(1.21)   | 2.76<br>(1.27)   | 5.46<br>(1.35)   | 3.03<br>(1.23)   | 2.59<br>(1.35)   | 2.41<br>(1.50)   |
| 2              | 8.77<br>(1.11)   | 6.42<br>(1.00)   | 3.55<br>(0.85)   | 2.16<br>(0.84)   | 4.52<br>(0.99)   | 2.39<br>(0.85)   | 1.96<br>(0.93)   | 1.76<br>(0.94)   |

Table S4: Performance of the TL, DL and EL control charts under the  $L(\theta, \delta/\sqrt{2})$  distribution with a time-varying UCL when  $m = 100$ ,  $n = 5$  and  $ARL_0 \approx 500$

| $\theta$        | TL                              |                     |                    |                    | DL                    |                    | EL                  |                    |
|-----------------|---------------------------------|---------------------|--------------------|--------------------|-----------------------|--------------------|---------------------|--------------------|
|                 | $\lambda = 0.05$<br>$L = 0.648$ | 0.10                | 0.25               | 0.50               | 0.05                  | 0.25               | 0.05                | 0.25               |
| $\delta = 1$    |                                 |                     |                    |                    |                       |                    |                     |                    |
| 0               | 495.70<br>(1559.88)             | 503.08<br>(1261.44) | 501.08<br>(949.60) | 499.80<br>(784.55) | 503.05<br>(1472.20)   | 498.80<br>(881.88) | 496.69<br>(1208.44) | 495.19<br>(786.66) |
| 0.1             | <b>389.47</b><br>(1348.10)      | 395.71<br>(1061.51) | 421.77<br>(844.30) | 432.30<br>(743.13) | 394.81<br>(1272.15)   | 422.36<br>(798.38) | 401.94<br>(1054.16) | 428.98<br>(722.28) |
| 0.25            | <b>97.72</b><br>(454.88)        | 127.80<br>(437.60)  | 168.15<br>(391.91) | 204.44<br>(418.71) | 110.12<br>(471.10)    | 180.25<br>(424.72) | 134.47<br>(425.63)  | 212.93<br>(423.13) |
| 0.5             | <b>7.38</b><br>(19.16)          | 11.13<br>(24.91)    | 17.25<br>(38.18)   | 26.59<br>(64.01)   | 7.78<br>(20.12)       | 19.32<br>(46.88)   | 11.22<br>(27.06)    | 29.19<br>(73.45)   |
| 1               | <b>1.29</b><br>(0.97)           | 1.51<br>(1.23)      | 1.89<br>(1.70)     | 2.21<br>(1.87)     | 1.34<br>(0.95)        | 1.94<br>(1.62)     | 1.59<br>(1.16)      | 2.38<br>(1.99)     |
| 1.5             | <b>1.02</b><br>(0.17)           | 1.05<br>(0.25)      | 1.11<br>(0.39)     | 1.18<br>(0.49)     | 1.04<br>(0.20)        | 1.13<br>(0.40)     | 1.09<br>(0.31)      | 1.23<br>(0.53)     |
| 2               | <b>1.00</b><br>(0.05)           | 1.01<br>(0.08)      | 1.02<br>(0.13)     | 1.03<br>(0.18)     | <b>1.00</b><br>(0.06) | 1.02<br>(0.14)     | 1.01<br>(0.11)      | 1.04<br>(0.22)     |
| $\delta = 1.1$  |                                 |                     |                    |                    |                       |                    |                     |                    |
| 0               | <b>203.42</b><br>(781.80)       | 225.31<br>(609.39)  | 252.57<br>(470.45) | 270.10<br>(439.88) | 208.00<br>(713.52)    | 254.11<br>(446.09) | 219.40<br>(584.02)  | 268.12<br>(443.43) |
| 0.1             | <b>163.17</b><br>(679.10)       | 186.41<br>(548.43)  | 215.08<br>(416.61) | 236.19<br>(412.31) | 168.17<br>(642.58)    | 218.80<br>(406.74) | 180.31<br>(480.03)  | 232.99<br>(394.93) |
| 0.25            | <b>50.34</b><br>(175.18)        | 69.62<br>(193.17)   | 98.88<br>(222.20)  | 123.04<br>(239.02) | 55.59<br>(197.35)     | 104.83<br>(233.53) | 72.33<br>(211.47)   | 125.86<br>(242.88) |
| 0.5             | <b>6.13</b><br>(11.66)          | 9.08<br>(17.52)     | 14.36<br>(28.03)   | 20.70<br>(43.19)   | 6.85<br>(15.70)       | 15.68<br>(33.45)   | 9.44<br>(20.05)     | 22.27<br>(46.20)   |
| 1               | <b>1.33</b><br>(1.04)           | 1.56<br>(1.39)      | 1.96<br>(1.73)     | 2.27<br>(1.86)     | 1.37<br>(1.00)        | 2.00<br>(1.69)     | 1.64<br>(1.21)      | 2.43<br>(2.01)     |
| 1.5             | <b>1.03</b><br>(0.21)           | 1.06<br>(0.30)      | 1.14<br>(0.44)     | 1.22<br>(0.54)     | 1.05<br>(0.24)        | 1.16<br>(0.46)     | 1.10<br>(0.34)      | 1.27<br>(0.58)     |
| 2               | <b>1.00</b><br>(0.06)           | 1.01<br>(0.09)      | 1.02<br>(0.16)     | 1.04<br>(0.22)     | 1.01<br>(0.08)        | 1.03<br>(0.17)     | 1.02<br>(0.14)      | 1.06<br>(0.24)     |
| $\delta = 1.25$ |                                 |                     |                    |                    |                       |                    |                     |                    |
| 0               | <b>53.38</b><br>(180.55)        | 70.63<br>(172.63)   | 93.62<br>(160.75)  | 113.05<br>(170.24) | 56.30<br>(175.14)     | 96.78<br>(158.74)  | 68.02<br>(155.17)   | 113.08<br>(171.34) |
| 0.1             | <b>46.34</b><br>(163.47)        | 62.02<br>(168.18)   | 83.98<br>(161.53)  | 101.88<br>(162.31) | 48.73<br>(151.82)     | 88.07<br>(165.33)  | 59.42<br>(131.03)   | 101.64<br>(157.21) |
| 0.25            | <b>22.50</b><br>(63.34)         | 31.67<br>(74.14)    | 44.96<br>(84.80)   | 59.84<br>(105.96)  | 24.08<br>(69.63)      | 48.50<br>(89.83)   | 30.77<br>(75.05)    | 62.38<br>(115.49)  |
| 0.5             | <b>5.34</b><br>(9.61)           | 7.66<br>(14.48)     | 10.82<br>(17.37)   | 14.92<br>(26.47)   | 5.49<br>(10.05)       | 11.44<br>(19.34)   | 7.14<br>(13.29)     | 15.69<br>(26.72)   |
| 1               | <b>1.36</b><br>(1.07)           | 1.63<br>(1.48)      | 2.03<br>(1.84)     | 2.35<br>(1.98)     | 1.40<br>(1.05)        | 2.07<br>(1.75)     | 1.68<br>(1.25)      | 2.49<br>(2.04)     |
| 1.5             | <b>1.04</b><br>(0.25)           | 1.08<br>(0.35)      | 1.18<br>(0.52)     | 1.28<br>(0.62)     | 1.06<br>(0.27)        | 1.20<br>(0.52)     | 1.13<br>(0.39)      | 1.34<br>(0.68)     |
| 2               | <b>1.01</b><br>(0.08)           | 1.01<br>(0.12)      | 1.04<br>(0.20)     | 1.07<br>(0.27)     | <b>1.01</b><br>(0.10) | 1.05<br>(0.23)     | 1.03<br>(0.17)      | 1.09<br>(0.31)     |

Table S4: continued

| $\theta$       | TL                              |                  |                  |                  | DL                    |                  | EL               |                  |
|----------------|---------------------------------|------------------|------------------|------------------|-----------------------|------------------|------------------|------------------|
|                | $\lambda = 0.05$<br>$L = 0.648$ | 0.10             | 0.25             | 0.50             | 0.05                  | 0.25             | 0.05             | 0.25             |
| $\delta = 1.5$ |                                 |                  |                  |                  |                       |                  |                  |                  |
| 0              | <b>13.48</b><br>(25.82)         | 19.03<br>(30.39) | 26.84<br>(39.11) | 35.29<br>(47.81) | 13.85<br>(26.11)      | 28.11<br>(39.83) | 17.86<br>(30.21) | 36.44<br>(49.53) |
| 0.1            | <b>12.49</b><br>(22.66)         | 17.69<br>(28.46) | 24.78<br>(36.33) | 33.24<br>(46.80) | 12.86<br>(23.70)      | 26.23<br>(38.25) | 16.66<br>(29.55) | 34.23<br>(47.87) |
| 0.25           | <b>8.87</b><br>(15.31)          | 12.57<br>(19.19) | 17.49<br>(25.11) | 23.28<br>(33.01) | 9.03<br>(15.59)       | 18.49<br>(27.52) | 11.50<br>(17.89) | 24.09<br>(33.69) |
| 0.5            | <b>3.89</b><br>(5.98)           | 5.42<br>(7.28)   | 7.38<br>(9.19)   | 9.46<br>(12.27)  | 3.95<br>(5.69)        | 7.57<br>(9.83)   | 5.06<br>(6.70)   | 10.01<br>(13.15) |
| 1              | <b>1.39</b><br>(1.08)           | 1.66<br>(1.50)   | 2.07<br>(1.84)   | 2.39<br>(1.98)   | 1.43<br>(1.06)        | 2.10<br>(1.75)   | 1.72<br>(1.27)   | 2.52<br>(2.02)   |
| 1.5            | <b>1.07</b><br>(0.31)           | 1.13<br>(0.45)   | 1.24<br>(0.63)   | 1.35<br>(0.72)   | 1.09<br>(0.34)        | 1.27<br>(0.63)   | 1.17<br>(0.46)   | 1.42<br>(0.77)   |
| 2              | <b>1.01</b><br>(0.13)           | 1.02<br>(0.19)   | 1.06<br>(0.26)   | 1.11<br>(0.35)   | 1.02<br>(0.15)        | 1.07<br>(0.29)   | 1.05<br>(0.23)   | 1.13<br>(0.38)   |
| $\delta = 2$   |                                 |                  |                  |                  |                       |                  |                  |                  |
| 0              | 4.18<br>(5.61)                  | 5.67<br>(6.79)   | 7.49<br>(8.00)   | 9.47<br>(10.42)  | <b>4.12</b><br>(5.13) | 7.61<br>(8.26)   | 5.08<br>(5.68)   | 9.96<br>(10.76)  |
| 0.1            | 4.04<br>(5.47)                  | 5.48<br>(6.52)   | 7.29<br>(7.63)   | 9.10<br>(9.80)   | <b>4.01</b><br>(4.98) | 7.36<br>(7.88)   | 4.94<br>(5.43)   | 9.60<br>(10.14)  |
| 0.25           | 3.54<br>(4.55)                  | 4.80<br>(5.58)   | 6.25<br>(6.33)   | 7.77<br>(8.10)   | <b>3.52</b><br>(4.22) | 6.29<br>(6.44)   | 4.34<br>(4.60)   | 8.12<br>(8.27)   |
| 0.5            | 2.55<br>(3.16)                  | 3.30<br>(3.79)   | 4.31<br>(4.33)   | 5.23<br>(5.27)   | <b>2.54</b><br>(2.85) | 4.33<br>(4.34)   | 3.09<br>(3.13)   | 5.51<br>(5.42)   |
| 1              | <b>1.37</b><br>(1.04)           | 1.60<br>(1.35)   | 1.98<br>(1.62)   | 2.30<br>(1.83)   | 1.41<br>(0.98)        | 2.02<br>(1.56)   | 1.66<br>(1.15)   | 2.43<br>(1.92)   |
| 1.5            | <b>1.10</b><br>(0.38)           | 1.17<br>(0.54)   | 1.32<br>(0.75)   | 1.46<br>(0.85)   | 1.12<br>(0.40)        | 1.35<br>(0.72)   | 1.24<br>(0.56)   | 1.52<br>(0.88)   |
| 2              | <b>1.03</b><br>(0.18)           | 1.05<br>(0.26)   | 1.11<br>(0.38)   | 1.18<br>(0.46)   | 1.04<br>(0.21)        | 1.13<br>(0.40)   | 1.08<br>(0.30)   | 1.21<br>(0.50)   |

Table S5: Performance of the TL, DL and EL control charts under the  $L(\theta, \delta/\sqrt{2})$  distribution with a steady-state UCL when  $m = 100$ ,  $n = 5$  and  $ARL_0 \approx 500$

| $\theta$        | TL                              |                     |                    |                    | DL                  |                    | EL                  |                    |
|-----------------|---------------------------------|---------------------|--------------------|--------------------|---------------------|--------------------|---------------------|--------------------|
|                 | $\lambda = 0.05$<br>$L = 0.500$ | 0.10                | 0.25               | 0.50               | 0.05                | 0.25               | 0.05                | 0.25               |
| $\delta = 1$    |                                 |                     |                    |                    |                     |                    |                     |                    |
| 0               | 500.71<br>(1341.24)             | 504.59<br>(1134.75) | 505.68<br>(918.42) | 498.95<br>(774.37) | 494.20<br>(1239.40) | 502.62<br>(855.57) | 497.27<br>(1080.90) | 490.52<br>(772.17) |
| 0.1             | 391.15<br>(1117.84)             | 400.83<br>(968.21)  | 422.93<br>(803.48) | 432.30<br>(728.22) | 391.42<br>(1066.24) | 423.76<br>(775.58) | 405.00<br>(967.63)  | 425.77<br>(709.15) |
| 0.25            | 117.84<br>(351.16)              | 140.20<br>(381.92)  | 172.72<br>(383.53) | 206.55<br>(411.18) | 121.67<br>(364.96)  | 183.70<br>(409.58) | 141.73<br>(373.95)  | 212.27<br>(416.10) |
| 0.5             | 23.26<br>(21.86)                | 21.08<br>(23.40)    | 20.96<br>(37.96)   | 28.24<br>(64.84)   | 17.88<br>(23.73)    | 21.93<br>(46.48)   | 16.51<br>(27.99)    | 30.54<br>(74.26)   |
| 1               | 10.91<br>(1.86)                 | 8.15<br>(1.69)      | 4.71<br>(1.46)     | 3.18<br>(1.68)     | 6.11<br>(1.69)      | 3.44<br>(1.57)     | 3.02<br>(1.66)      | 2.91<br>(2.08)     |
| 1.5             | 8.31<br>(0.93)                  | 6.04<br>(0.82)      | 3.29<br>(0.62)     | 1.95<br>(0.61)     | 4.18<br>(0.78)      | 2.20<br>(0.56)     | 1.67<br>(0.71)      | 1.50<br>(0.69)     |
| 2               | 7.25<br>(0.57)                  | 5.22<br>(0.48)      | 2.77<br>(0.48)     | 1.48<br>(0.52)     | 3.41<br>(0.53)      | 1.82<br>(0.45)     | 1.24<br>(0.45)      | 1.15<br>(0.37)     |
| $\delta = 1.1$  |                                 |                     |                    |                    |                     |                    |                     |                    |
| 0               | 224.24<br>(667.12)              | 236.16<br>(534.58)  | 259.86<br>(455.97) | 266.31<br>(434.54) | 222.70<br>(603.52)  | 259.99<br>(435.80) | 234.48<br>(537.20)  | 268.54<br>(440.09) |
| 0.1             | 181.54<br>(544.45)              | 200.60<br>(509.96)  | 221.20<br>(404.85) | 232.78<br>(402.96) | 182.94<br>(518.76)  | 224.46<br>(399.66) | 193.87<br>(449.11)  | 233.25<br>(392.70) |
| 0.25            | 73.40<br>(154.22)               | 85.13<br>(203.39)   | 103.92<br>(216.88) | 121.40<br>(234.18) | 72.40<br>(163.69)   | 108.23<br>(227.80) | 82.81<br>(192.71)   | 126.52<br>(126.52) |
| 0.5             | 21.93<br>(14.82)                | 19.45<br>(19.51)    | 18.08<br>(28.64)   | 20.55<br>(42.53)   | 16.41<br>(16.20)    | 18.26<br>(33.64)   | 14.46<br>(21.99)    | 23.47<br>(46.16)   |
| 1               | 11.02<br>(1.90)                 | 8.25<br>(1.73)      | 4.80<br>(1.59)     | 3.24<br>(1.74)     | 6.19<br>(1.73)      | 3.51<br>(1.64)     | 3.08<br>(1.73)      | 2.96<br>(2.08)     |
| 1.5             | 8.43<br>(0.97)                  | 6.13<br>(0.86)      | 3.35<br>(0.66)     | 1.99<br>(0.65)     | 4.26<br>(0.81)      | 2.24<br>(0.60)     | 1.73<br>(0.75)      | 1.50<br>(0.69)     |
| 2               | 7.34<br>(0.60)                  | 5.29<br>(0.52)      | 2.82<br>(0.49)     | 1.53<br>(0.54)     | 3.48<br>(0.56)      | 1.85<br>(0.45)     | 1.29<br>(0.48)      | 1.17<br>(0.40)     |
| $\delta = 1.25$ |                                 |                     |                    |                    |                     |                    |                     |                    |
| 0               | 76.65<br>(156.97)               | 85.93<br>(157.29)   | 100.28<br>(155.54) | 116.14<br>(170.58) | 74.13<br>(143.79)   | 102.62<br>(158.68) | 81.27<br>(149.91)   | 113.08<br>(171.34) |
| 0.1             | 68.80<br>(149.85)               | 75.93<br>(152.21)   | 90.18<br>(159.05)  | 104.72<br>(160.82) | 66.01<br>(136.99)   | 92.88<br>(161.64)  | 70.75<br>(126.61)   | 102.79<br>(154.89) |
| 0.25            | 42.12<br>(61.56)                | 44.12<br>(70.95)    | 50.65<br>(85.05)   | 61.95<br>(105.35)  | 38.06<br>(63.45)    | 52.49<br>(89.82)   | 39.42<br>(73.35)    | 63.79<br>(114.41)  |
| 0.5             | 20.09<br>(10.55)                | 17.17<br>(13.61)    | 14.43<br>(18.25)   | 16.33<br>(26.99)   | 14.45<br>(11.34)    | 14.00<br>(20.94)   | 11.76<br>(15.62)    | 16.88<br>(26.83)   |
| 1               | 11.17<br>(2.00)                 | 8.37<br>(1.83)      | 4.86<br>(1.64)     | 3.33<br>(1.85)     | 6.28<br>(1.78)      | 3.59<br>(1.68)     | 3.15<br>(1.77)      | 3.03<br>(2.09)     |
| 1.5             | 8.59<br>(1.02)                  | 6.26<br>(0.90)      | 3.43<br>(0.71)     | 2.05<br>(0.69)     | 4.37<br>(0.87)      | 2.31<br>(0.66)     | 1.80<br>(0.80)      | 1.63<br>(0.81)     |
| 2               | 7.47<br>(0.66)                  | 5.39<br>(0.57)      | 2.88<br>(0.51)     | 1.59<br>(0.55)     | 3.58<br>(0.60)      | 1.89<br>(0.48)     | 1.35<br>(0.52)      | 1.22<br>(0.45)     |

Table S5: continued

| $\theta$       | TL               |                  |                  |                  | DL               |                  | EL               |                  |
|----------------|------------------|------------------|------------------|------------------|------------------|------------------|------------------|------------------|
|                | $\lambda = 0.05$ | 0.10             | 0.25             | 0.50             | 0.05             | 0.25             | 0.05             | 0.25             |
|                | $L = 0.500$      | 1.161            | 2.114            | 3.011            | 0.816            | 2.455            | 1.838            | 3.484            |
| $\delta = 1.5$ |                  |                  |                  |                  |                  |                  |                  |                  |
| 0              | 31.24<br>(23.21) | 30.34<br>(29.14) | 31.50<br>(38.51) | 34.97<br>(47.29) | 26.10<br>(25.71) | 31.77<br>(39.66) | 24.92<br>(30.04) | 37.97<br>(48.51) |
| 0.10           | 29.97<br>(20.48) | 28.80<br>(27.09) | 29.52<br>(36.21) | 35.29<br>(46.56) | 24.77<br>(22.53) | 29.69<br>(37.88) | 23.60<br>(28.91) | 35.72<br>(47.67) |
| 0.25           | 25.15<br>(14.82) | 22.97<br>(19.06) | 21.56<br>(25.35) | 25.11<br>(32.74) | 19.64<br>(16.46) | 21.57<br>(28.18) | 17.33<br>(18.97) | 25.38<br>(33.14) |
| 0.50           | 17.58<br>(6.05)  | 14.37<br>(6.62)  | 10.83<br>(9.18)  | 10.83<br>(12.45) | 11.93<br>(6.22)  | 9.83<br>(9.79)   | 8.71<br>(7.69)   | 10.96<br>(12.93) |
| 1.00           | 11.22<br>(1.98)  | 8.42<br>(1.81)   | 4.90<br>(1.58)   | 3.36<br>(1.85)   | 6.32<br>(1.77)   | 3.63<br>(1.68)   | 3.21<br>(1.78)   | 3.08<br>(2.12)   |
| 1.50           | 8.81<br>(1.09)   | 6.44<br>(0.98)   | 3.54<br>(0.78)   | 2.14<br>(0.77)   | 4.53<br>(0.94)   | 2.41<br>(0.76)   | 1.92<br>(0.87)   | 1.72<br>(0.88)   |
| 2.00           | 7.67<br>(0.74)   | 5.53<br>(0.64)   | 2.98<br>(0.55)   | 1.68<br>(0.58)   | 3.73<br>(0.66)   | 1.95<br>(0.53)   | 1.45<br>(0.59)   | 1.30<br>(0.52)   |
| $\delta = 2$   |                  |                  |                  |                  |                  |                  |                  |                  |
| 0              | 17.95<br>(5.33)  | 14.66<br>(5.72)  | 10.93<br>(7.35)  | 10.84<br>(10.31) | 12.23<br>(5.46)  | 9.81<br>(7.69)   | 8.90<br>(6.51)   | 11.00<br>(10.81) |
| 0.10           | 17.75<br>(5.20)  | 14.45<br>(5.52)  | 10.70<br>(7.01)  | 10.43<br>(9.69)  | 12.03<br>(5.31)  | 9.60<br>(7.57)   | 8.67<br>(6.25)   | 10.65<br>(10.23) |
| 0.25           | 16.84<br>(4.52)  | 13.51<br>(4.63)  | 9.60<br>(5.70)   | 9.06<br>(8.00)   | 11.13<br>(4.47)  | 8.52<br>(6.26)   | 7.67<br>(5.21)   | 9.07<br>(8.29)   |
| 0.50           | 14.68<br>(3.43)  | 11.48<br>(3.44)  | 7.51<br>(3.80)   | 6.33<br>(5.08)   | 9.20<br>(3.39)   | 6.29<br>(4.16)   | 5.76<br>(3.87)   | 6.24<br>(5.33)   |
| 1.00           | 11.08<br>(1.83)  | 8.29<br>(1.67)   | 4.81<br>(1.48)   | 3.25<br>(1.70)   | 6.20<br>(1.64)   | 3.53<br>(1.56)   | 3.11<br>(1.63)   | 2.96<br>(1.96)   |
| 1.50           | 9.10<br>(1.16)   | 6.67<br>(1.06)   | 3.70<br>(0.87)   | 2.27<br>(0.86)   | 4.74<br>(1.02)   | 2.53<br>(0.85)   | 2.07<br>(0.94)   | 1.87<br>(1.00)   |
| 2.00           | 8.01<br>(0.84)   | 5.80<br>(0.75)   | 3.14<br>(0.62)   | 1.83<br>(0.63)   | 3.97<br>(0.74)   | 2.07<br>(0.60)   | 1.60<br>(0.68)   | 1.42<br>(0.64)   |

Table S6: Performance of the TL, DL and EL control charts under the  $SE(\theta, \delta)$  distribution with a time-varying UCL when  $m = 100$ ,  $n = 5$  and  $ARL_0 \approx 500$

| $\theta$        | TL                              |                       |                       |                            | DL                    |                       | EL                    |                           |
|-----------------|---------------------------------|-----------------------|-----------------------|----------------------------|-----------------------|-----------------------|-----------------------|---------------------------|
|                 | $\lambda = 0.05$<br>$L = 0.648$ | 0.10                  | 0.25                  | 0.50                       | 0.05                  | 0.25                  | 0.05                  | 0.25                      |
| $\delta = 1$    |                                 |                       |                       |                            |                       |                       |                       |                           |
| 0               | 495.70<br>(1559.88)             | 503.08<br>(1261.44)   | 501.75<br>(949.60)    | 499.80<br>(784.55)         | 504.04<br>(1472.20)   | 498.80<br>(881.88)    | 496.69<br>(1208.44)   | 495.19<br>(786.66)        |
| 0.1             | 1491.40<br>(3582.55)            | 1331.85<br>(2977.57)  | 1096.00<br>(2180.56)  | <b>956.14</b><br>(1699.59) | 1452.33<br>(3385.46)  | 1052.89<br>(2041.15)  | 1313.79<br>(2880.36)  | 966.76<br>(1698.97)       |
| 0.25            | <b>122.53</b><br>(969.56)       | 127.19<br>(775.96)    | 157.47<br>(630.13)    | 220.09<br>(545.39)         | 125.98<br>(925.01)    | 168.08<br>(558.01)    | 139.46<br>(792.95)    | 248.48<br>(571.66)        |
| 0.5             | <b>2.41</b><br>(3.21)           | 4.50<br>(5.13)        | 8.05<br>(9.19)        | 17.56<br>(30.07)           | 2.96<br>(3.46)        | 9.57<br>(12.68)       | 5.56<br>(5.84)        | 22.66<br>(39.41)          |
| 1               | <b>1.05</b><br>(0.22)           | 1.35<br>(0.73)        | 1.97<br>(1.46)        | 2.72<br>(2.42)             | 1.17<br>(0.42)        | 2.13<br>(1.56)        | 1.66<br>(1.05)        | 3.29<br>(3.31)            |
| 1.5             | <b>1.00</b><br>(0.02)           | 1.01<br>(0.08)        | 1.04<br>(0.23)        | 1.12<br>(0.39)             | <b>1.00</b><br>(0.04) | 1.06<br>(0.27)        | 1.02<br>(0.16)        | 1.19<br>(0.50)            |
| 2               | <b>1.00</b><br>(0.00)           | <b>1.00</b><br>(0.00) | <b>1.00</b><br>(0.02) | <b>1.00</b><br>(0.04)      | <b>1.00</b><br>(0.00) | <b>1.00</b><br>(0.03) | <b>1.00</b><br>(0.00) | <b>1.00</b><br>(0.06)     |
| $\delta = 1.1$  |                                 |                       |                       |                            |                       |                       |                       |                           |
| 0               | <b>293.30</b><br>(1070.50)      | 314.82<br>(878.66)    | 333.81<br>(635.25)    | 345.25<br>(558.85)         | 297.23<br>(986.05)    | 336.68<br>(618.03)    | 304.80<br>(785.74)    | 341.05<br>(558.43)        |
| 0.1             | 580.45<br>(2047.64)             | 540.35<br>(1651.33)   | 492.89<br>(1221.63)   | 457.36<br>(898.94)         | 570.53<br>(1900.96)   | 479.14<br>(1110.37)   | 517.00<br>(1510.34)   | <b>440.74</b><br>(858.43) |
| 0.25            | <b>45.70</b><br>(482.62)        | 55.75<br>(407.55)     | 75.93<br>(250.03)     | 117.03<br>(256.55)         | 47.69<br>(440.50)     | 87.49<br>(275.41)     | 59.64<br>(381.97)     | 129.74<br>(277.14)        |
| 0.5             | <b>2.24</b><br>(2.79)           | 4.03<br>(4.35)        | 6.94<br>(7.19)        | 13.58<br>(21.02)           | 2.71<br>(2.95)        | 8.07<br>(10.50)       | 4.89<br>(4.83)        | 16.87<br>(24.92)          |
| 1               | <b>1.04</b><br>(0.21)           | 1.27<br>(0.64)        | 1.77<br>(1.27)        | 2.32<br>(1.90)             | 1.13<br>(0.38)        | 1.89<br>(1.34)        | 1.53<br>(0.92)        | 2.75<br>(2.52)            |
| 1.5             | <b>1.00</b><br>(0.01)           | <b>1.00</b><br>(0.07) | 1.03<br>(0.18)        | 1.09<br>(0.33)             | <b>1.00</b><br>(0.03) | 1.05<br>(0.24)        | 1.02<br>(0.13)        | 1.15<br>(0.43)            |
| 2               | <b>1.00</b><br>(0.00)           | <b>1.00</b><br>(0.00) | <b>1.00</b><br>(0.01) | <b>1.00</b><br>(0.03)      | <b>1.00</b><br>(0.00) | <b>1.00</b><br>(0.04) | <b>1.00</b><br>(0.00) | <b>1.00</b><br>(0.05)     |
| $\delta = 1.25$ |                                 |                       |                       |                            |                       |                       |                       |                           |
| 0               | <b>87.91</b><br>(341.97)        | 113.66<br>(317.59)    | 141.85<br>(288.16)    | 161.96<br>(274.94)         | 93.45<br>(311.39)     | 147.82<br>(293.50)    | 111.06<br>(285.38)    | 159.25<br>(266.44)        |
| 0.1             | <b>99.83</b><br>(566.60)        | 111.15<br>(403.28)    | 134.15<br>(321.89)    | 149.39<br>(282.66)         | 102.73<br>(531.49)    | 137.00<br>(309.21)    | 111.45<br>(415.69)    | 150.23<br>(287.16)        |
| 0.25            | <b>13.48</b><br>(89.03)         | 19.69<br>(60.72)      | 31.67<br>(75.76)      | 49.71<br>(95.91)           | 14.55<br>(84.55)      | 35.74<br>(81.57)      | 20.89<br>(68.76)      | 54.12<br>(108.86)         |
| 0.5             | <b>1.97</b><br>(2.14)           | 3.36<br>(3.45)        | 5.52<br>(5.34)        | 9.09<br>(12.52)            | 2.35<br>(2.30)        | 6.09<br>(6.61)        | 3.98<br>(3.65)        | 10.82<br>(13.73)          |
| 1               | <b>1.03</b><br>(0.17)           | 1.19<br>(0.53)        | 1.56<br>(1.04)        | 1.95<br>(1.43)             | 1.09<br>(0.32)        | 1.65<br>(1.09)        | 1.38<br>(0.75)        | 2.23<br>(1.74)            |
| 1.5             | <b>1.00</b><br>(0.00)           | <b>1.00</b><br>(0.06) | 1.02<br>(0.14)        | 1.07<br>(0.29)             | <b>1.00</b><br>(0.03) | 1.03<br>(0.19)        | 1.01<br>(0.11)        | 1.11<br>(0.36)            |
| 2               | <b>1.00</b><br>(0.00)           | <b>1.00</b><br>(0.00) | <b>1.00</b><br>(0.00) | <b>1.00</b><br>(0.03)      | <b>1.00</b><br>(0.00) | <b>1.00</b><br>(0.03) | <b>1.00</b><br>(0.00) | <b>1.00</b><br>(0.05)     |

Table S6: continued

| $\theta$       | TL                              |                       |                       |                       | DL                    |                       | EL                    |                       |
|----------------|---------------------------------|-----------------------|-----------------------|-----------------------|-----------------------|-----------------------|-----------------------|-----------------------|
|                | $\lambda = 0.05$<br>$L = 0.648$ | 0.10                  | 0.25                  | 0.50                  | 0.05                  | 0.25                  | 0.05                  | 0.25                  |
| $\delta = 1.5$ |                                 |                       |                       |                       |                       |                       |                       |                       |
| 0              | <b>17.13</b><br>(36.32)         | 24.39<br>(45.77)      | 34.23<br>(57.81)      | 44.01<br>(69.75)      | 18.18<br>(40.54)      | 35.93<br>(59.27)      | 22.95<br>(44.31)      | 44.60<br>(68.86)      |
| 0.1            | <b>13.51</b><br>(31.73)         | 19.44<br>(39.94)      | 27.27<br>(48.15)      | 35.60<br>(58.19)      | 14.14<br>(33.47)      | 28.97<br>(51.25)      | 18.37<br>(38.08)      | 35.75<br>(56.60)      |
| 0.25           | <b>5.32</b><br>(9.23)           | 7.89<br>(12.18)       | 11.53<br>(16.44)      | 16.61<br>(24.87)      | 5.55<br>(9.01)        | 12.37<br>(17.94)      | 7.74<br>(10.92)       | 17.51<br>(25.17)      |
| 0.5            | <b>1.64</b><br>(1.50)           | 2.52<br>(2.36)        | 3.83<br>(3.53)        | 5.33<br>(5.57)        | 1.90<br>(1.59)        | 4.06<br>(3.67)        | 2.90<br>(2.42)        | 6.08<br>(6.50)        |
| 1              | <b>1.02</b><br>(0.13)           | 1.11<br>(0.39)        | 1.33<br>(0.75)        | 1.60<br>(1.04)        | 1.06<br>(0.25)        | 1.41<br>(0.80)        | 1.23<br>(0.56)        | 1.77<br>(1.21)        |
| 1.5            | <b>1.00</b><br>(0.00)           | <b>1.00</b><br>(0.04) | 1.01<br>(0.11)        | 1.04<br>(0.21)        | <b>1.00</b><br>(0.02) | 1.02<br>(0.13)        | 1.01<br>(0.08)        | 1.07<br>(0.27)        |
| 2              | <b>1.00</b><br>(0.00)           | <b>1.00</b><br>(0.00) | <b>1.00</b><br>(0.00) | <b>1.00</b><br>(0.03) | <b>1.00</b><br>(0.00) | <b>1.00</b><br>(0.02) | <b>1.00</b><br>(0.00) | <b>1.00</b><br>(0.03) |
| $\delta = 2$   |                                 |                       |                       |                       |                       |                       |                       |                       |
| 0              | <b>4.02</b><br>(5.72)           | 5.50<br>(6.89)        | 7.17<br>(7.92)        | 8.74<br>(9.96)        | <b>4.02</b><br>(5.31) | 7.26<br>(8.22)        | 4.93<br>(5.83)        | 8.98<br>(10.08)       |
| 0.1            | <b>3.42</b><br>(4.58)           | 4.70<br>(5.70)        | 6.18<br>(6.63)        | 7.45<br>(8.25)        | 3.47<br>(4.32)        | 6.19<br>(6.76)        | 4.34<br>(4.78)        | 7.70<br>(8.54)        |
| 0.25           | <b>2.30</b><br>(2.71)           | 3.10<br>(3.35)        | 4.19<br>(4.02)        | 5.06<br>(4.89)        | 2.40<br>(2.52)        | 4.26<br>(4.16)        | 3.11<br>(2.95)        | 5.36<br>(5.24)        |
| 0.5            | <b>1.31</b><br>(0.83)           | 1.71<br>(1.32)        | 2.32<br>(1.84)        | 2.81<br>(2.24)        | 1.44<br>(0.92)        | 2.39<br>(1.86)        | 1.91<br>(1.38)        | 3.07<br>(2.52)        |
| 1              | <b>1.01</b><br>(0.08)           | 1.05<br>(0.24)        | 1.15<br>(0.47)        | 1.30<br>(0.65)        | 1.03<br>(0.16)        | 1.20<br>(0.54)        | 1.11<br>(0.37)        | 1.38<br>(0.72)        |
| 1.5            | <b>1.00</b><br>(0.00)           | <b>1.00</b><br>(0.03) | <b>1.00</b><br>(0.07) | 1.02<br>(0.13)        | <b>1.00</b><br>(0.00) | 1.01<br>(0.08)        | <b>1.00</b><br>(0.06) | 1.03<br>(0.18)        |
| 2              | <b>1.00</b><br>(0.00)           | <b>1.00</b><br>(0.00) | <b>1.00</b><br>(0.00) | <b>1.00</b><br>(0.01) | <b>1.00</b><br>(0.00) | <b>1.00</b><br>(0.00) | <b>1.00</b><br>(0.00) | <b>1.00</b><br>(0.02) |

Table S7: Performance of the TL, DL and EL control charts under the  $SE(\theta, \delta)$  distribution with a steady-state UCL when  $m = 100$ ,  $n = 5$  and  $ARL_0 \approx 500$

| $\theta$        | TL                   |                      |                      |                     | DL                   |                      | EL                   |                     |
|-----------------|----------------------|----------------------|----------------------|---------------------|----------------------|----------------------|----------------------|---------------------|
|                 | $\lambda = 0.05$     | 0.10                 | 0.25                 | 0.50                | 0.05                 | 0.25                 | 0.05                 | 0.25                |
|                 | $L = 0.500$          | 1.161                | 2.114                | 3.011               | 0.816                | 2.455                | 1.838                | 3.484               |
| $\delta = 1$    |                      |                      |                      |                     |                      |                      |                      |                     |
| 0               | 500.70<br>(1341.24)  | 504.59<br>(1134.75)  | 505.68<br>(918.42)   | 498.95<br>(774.37)  | 494.20<br>(1239.40)  | 502.62<br>(855.57)   | 497.25<br>(1080.90)  | 490.52<br>(772.17)  |
| 0.1             | 1470.31<br>(3290.25) | 1291.33<br>(2795.54) | 1084.89<br>(2138.20) | 947.92<br>(1670.71) | 1401.46<br>(3115.98) | 1035.30<br>(1980.78) | 1271.01<br>(2707.17) | 952.93<br>(1675.27) |
| 0.25            | 139.70<br>(890.44)   | 134.96<br>(725.33)   | 160.11<br>(613.83)   | 220.39<br>(533.66)  | 133.44<br>(825.65)   | 169.94<br>(545.69)   | 146.41<br>(755.77)   | 248.34<br>(566.32)  |
| 0.5             | 17.84<br>(3.78)      | 14.44<br>(4.31)      | 11.07<br>(8.57)      | 18.49<br>(29.79)    | 11.99<br>(4.00)      | 11.44<br>(13.18)     | 9.59<br>(6.26)       | 23.54<br>(39.08)    |
| 1               | 11.74<br>(1.91)      | 8.84<br>(1.68)       | 5.16<br>(1.38)       | 3.72<br>(2.20)      | 6.71<br>(1.61)       | 3.85<br>(1.45)       | 3.53<br>(1.63)       | 3.93<br>(3.37)      |
| 1.5             | 8.68<br>(1.00)       | 6.33<br>(0.84)       | 3.43<br>(0.60)       | 2.09<br>(0.46)      | 4.43<br>(0.77)       | 2.29<br>(0.53)       | 1.82<br>(0.64)       | 1.56<br>(0.69)      |
| 2               | 7.43<br>(0.60)       | 5.33<br>(0.51)       | 2.94<br>(0.33)       | 1.68<br>(0.47)      | 3.56<br>(0.55)       | 1.98<br>(0.22)       | 1.21<br>(0.41)       | 1.07<br>(0.26)      |
| $\delta = 1.1$  |                      |                      |                      |                     |                      |                      |                      |                     |
| 0               | 311.56<br>(913.97)   | 320.11<br>(774.84)   | 339.04<br>(606.04)   | 347.11<br>(551.12)  | 309.22<br>(865.84)   | 340.27<br>(597.52)   | 311.74<br>(700.06)   | 340.41<br>(545.87)  |
| 0.1             | 579.61<br>(1837.64)  | 536.45<br>(1530.07)  | 491.66<br>(1180.69)  | 457.68<br>(882.83)  | 559.69<br>(1715.71)  | 481.53<br>(1081.52)  | 515.62<br>(1433.47)  | 440.41<br>(856.63)  |
| 0.25            | 62.69<br>(399.68)    | 66.05<br>(358.01)    | 80.26<br>(244.49)    | 118.71<br>(255.04)  | 60.60<br>(402.77)    | 91.08<br>(274.04)    | 67.49<br>(339.90)    | 129.35<br>(267.82)  |
| 0.5             | 17.08<br>(3.52)      | 13.71<br>(3.96)      | 10.04<br>(6.67)      | 14.50<br>(20.64)    | 11.29<br>(3.58)      | 9.88<br>(10.13)      | 8.63<br>(5.44)       | 17.73<br>(24.60)    |
| 1               | 11.24<br>(1.78)      | 8.42<br>(1.56)       | 4.86<br>(1.26)       | 3.32<br>(1.69)      | 6.31<br>(1.49)       | 3.56<br>(1.29)       | 3.21<br>(1.47)       | 3.34<br>(2.53)      |
| 1.5             | 8.50<br>(0.94)       | 6.19<br>(0.80)       | 3.34<br>(0.55)       | 2.09<br>(0.46)      | 4.30<br>(0.71)       | 2.22<br>(0.47)       | 1.73<br>(0.61)       | 1.48<br>(0.64)      |
| 2               | 7.36<br>(0.57)       | 5.27<br>(0.47)       | 2.91<br>(0.34)       | 1.63<br>(0.48)      | 3.49<br>(0.54)       | 1.96<br>(0.24)       | 1.17<br>(0.38)       | 1.06<br>(0.24)      |
| $\delta = 1.25$ |                      |                      |                      |                     |                      |                      |                      |                     |
| 0               | 111.82<br>(280.47)   | 128.11<br>(278.03)   | 147.73<br>(271.56)   | 164.26<br>(272.41)  | 112.18<br>(262.57)   | 152.05<br>(282.44)   | 123.67<br>(271.15)   | 159.68<br>(258.58)  |
| 0.1             | 121.24<br>(512.93)   | 125.34<br>(387.15)   | 140.97<br>(333.76)   | 151.26<br>(279.61)  | 119.60<br>(484.49)   | 141.83<br>(303.99)   | 121.21<br>(393.78)   | 150.15<br>(277.90)  |
| 0.25            | 30.82<br>(45.81)     | 30.62<br>(59.77)     | 35.74<br>(75.50)     | 51.71<br>(97.31)    | 26.26<br>(62.86)     | 38.77<br>(81.86)     | 27.98<br>(65.70)     | 55.36<br>(108.99)   |
| 0.5             | 15.88<br>(3.18)      | 12.55<br>(3.26)      | 8.61<br>(4.53)       | 10.03<br>(12.27)    | 10.19<br>(3.12)      | 7.88<br>(6.30)       | 7.20<br>(4.25)       | 11.71<br>(13.60)    |
| 1               | 10.63<br>(1.60)      | 7.92<br>(1.40)       | 4.50<br>(1.12)       | 2.96<br>(1.27)      | 5.85<br>(1.32)       | 3.22<br>(1.12)       | 2.82<br>(1.26)       | 2.76<br>(1.78)      |
| 1.5             | 8.27<br>(0.87)       | 6.00<br>(0.74)       | 3.24<br>(0.50)       | 1.96<br>(0.43)      | 4.16<br>(0.67)       | 2.15<br>(0.41)       | 1.62<br>(0.59)       | 1.38<br>(0.56)      |
| 2               | 7.26<br>(0.52)       | 5.20<br>(0.42)       | 2.87<br>(0.37)       | 1.57<br>(0.50)      | 3.41<br>(0.52)       | 1.94<br>(0.27)       | 1.13<br>(0.34)       | 1.04<br>(0.20)      |



Table S7: continued

| $\theta$       | TL               |                  |                  |                  | DL               |                  | EL               |                  |
|----------------|------------------|------------------|------------------|------------------|------------------|------------------|------------------|------------------|
|                | $\lambda = 0.05$ | 0.10             | 0.25             | 0.50             | 0.05             | 0.25             | 0.05             | 0.25             |
|                | $L = 0.500$      | 1.161            | 2.114            | 3.011            | 0.816            | 2.455            | 1.838            | 3.484            |
| $\delta = 1.5$ |                  |                  |                  |                  |                  |                  |                  |                  |
| 0              | 35.67<br>(35.78) | 36.20<br>(47.42) | 39.05<br>(57.54) | 46.09<br>(70.20) | 30.99<br>(38.46) | 39.71<br>(60.13) | 31.00<br>(46.07) | 45.92<br>(68.14) |
| 0.1            | 31.36<br>(45.13) | 30.54<br>(42.54) | 31.80<br>(49.57) | 37.40<br>(57.29) | 26.15<br>(45.21) | 32.26<br>(51.39) | 25.41<br>(40.25) | 37.08<br>(56.22) |
| 0.25           | 20.31<br>(8.58)  | 17.35<br>(11.22) | 14.95<br>(16.38) | 17.99<br>(24.70) | 14.63<br>(9.30)  | 14.73<br>(17.99) | 12.32<br>(12.31) | 18.70<br>(25.52) |
| 0.5            | 14.09<br>(2.67)  | 10.91<br>(2.55)  | 6.93<br>(2.77)   | 6.26<br>(5.40)   | 8.65<br>(2.50)   | 5.80<br>(3.43)   | 5.44<br>(3.05)   | 6.82<br>(6.47)   |
| 1              | 9.88<br>(1.38)   | 7.29<br>(1.20)   | 4.08<br>(0.95)   | 2.57<br>(0.94)   | 5.28<br>(1.12)   | 2.84<br>(0.91)   | 2.41<br>(1.02)   | 2.25<br>(1.29)   |
| 1.5            | 7.97<br>(0.77)   | 5.75<br>(0.67)   | 3.12<br>(0.42)   | 1.87<br>(0.43)   | 3.94<br>(0.61)   | 2.07<br>(0.33)   | 1.49<br>(0.55)   | 1.28<br>(0.49)   |
| 2              | 7.13<br>(0.46)   | 5.11<br>(0.34)   | 2.79<br>(0.42)   | 1.47<br>(0.50)   | 3.29<br>(0.46)   | 1.89<br>(0.32)   | 1.09<br>(0.29)   | 1.03<br>(0.16)   |
| $\delta = 2$   |                  |                  |                  |                  |                  |                  |                  |                  |
| 0              | 17.39<br>(5.59)  | 14.15<br>(5.89)  | 10.49<br>(7.51)  | 9.99<br>(9.84)   | 11.78<br>(5.82)  | 9.44<br>(8.17)   | 8.44<br>(6.74)   | 9.84<br>(9.88)   |
| 0.1            | 16.36<br>(4.76)  | 13.14<br>(4.96)  | 9.33<br>(6.04)   | 8.60<br>(8.15)   | 10.82<br>(4.92)  | 8.20<br>(6.63)   | 7.46<br>(5.72)   | 8.48<br>(8.31)   |
| 0.25           | 14.30<br>(3.30)  | 11.14<br>(3.23)  | 7.25<br>(3.56)   | 6.05<br>(4.69)   | 8.89<br>(3.18)   | 6.02<br>(3.93)   | 5.55<br>(3.62)   | 6.08<br>(5.22)   |
| 0.5            | 11.70<br>(1.95)  | 8.83<br>(1.79)   | 5.22<br>(1.60)   | 3.73<br>(2.09)   | 6.72<br>(1.77)   | 3.94<br>(1.76)   | 3.58<br>(1.90)   | 3.64<br>(2.54)   |
| 1              | 8.92<br>(1.08)   | 6.52<br>(0.94)   | 3.58<br>(0.73)   | 2.18<br>(0.67)   | 4.61<br>(0.89)   | 2.42<br>(0.68)   | 1.95<br>(0.81)   | 1.74<br>(0.85)   |
| 1.5            | 7.56<br>(0.64)   | 5.43<br>(0.56)   | 2.98<br>(0.37)   | 1.71<br>(0.48)   | 3.67<br>(0.58)   | 1.97<br>(0.31)   | 1.32<br>(0.49)   | 1.16<br>(0.38)   |
| 2              | 6.97<br>(0.40)   | 5.03<br>(0.25)   | 2.64<br>(0.48)   | 1.33<br>(0.47)   | 3.15<br>(0.36)   | 1.79<br>(0.41)   | 1.05<br>(0.22)   | 1.01<br>(0.11)   |

Table S8: Performance of the TL, DL and EL control charts under the  $Gumbel(\theta, \delta)$  distribution with a time-varying UCL when  $m = 100$ ,  $n = 5$  and  $ARL_0 \approx 500$

| $\theta$        | TL                         |                     |                     |                    | DL                  |                     | EL                  |                           |
|-----------------|----------------------------|---------------------|---------------------|--------------------|---------------------|---------------------|---------------------|---------------------------|
|                 | $\lambda = 0.05$           | 0.10                | 0.25                | 0.50               | 0.05                | 0.25                | 0.05                | 0.25                      |
|                 | $L = 0.648$                | 1.236               | 2.140               | 3.020              | 0.936               | 2.472               | 1.894               | 3.497                     |
| $\delta = 1$    |                            |                     |                     |                    |                     |                     |                     |                           |
| 0               | 495.70<br>(1559.88)        | 503.08<br>(1261.44) | 501.75<br>(949.60)  | 499.80<br>(784.55) | 503.05<br>(1472.20) | 498.80<br>(881.88)  | 496.69<br>(1208.44) | 495.19<br>(786.66)        |
| 0.1             | 608.35<br>(1874.52)        | 592.73<br>(1486.65) | 579.07<br>(1127.43) | 571.63<br>(951.23) | 601.78<br>(1722.57) | 569.12<br>(1046.90) | 582.97<br>(1382.66) | <b>563.33</b><br>(896.68) |
| 0.25            | <b>368.19</b><br>(1425.38) | 386.73<br>(1181.14) | 410.79<br>(927.55)  | 433.69<br>(808.35) | 382.66<br>(1368.41) | 415.65<br>(898.69)  | 394.90<br>(1156.90) | 441.18<br>(816.88)        |
| 0.5             | <b>39.60</b><br>(283.77)   | 55.81<br>(296.07)   | 85.99<br>(258.39)   | 122.86<br>(260.63) | 45.11<br>(303.67)   | 95.69<br>(252.55)   | 61.32<br>(289.56)   | 134.65<br>(299.84)        |
| 1               | <b>2.58</b><br>(3.40)      | 3.98<br>(4.69)      | 6.04<br>(6.92)      | 9.13<br>(14.10)    | 2.84<br>(3.33)      | 6.54<br>(8.08)      | 4.21<br>(4.59)      | 10.36<br>(16.14)          |
| 1.5             | <b>1.17</b><br>(0.59)      | 1.43<br>(0.99)      | 1.91<br>(1.48)      | 2.34<br>(1.86)     | 1.26<br>(0.67)      | 1.99<br>(1.50)      | 1.62<br>(1.05)      | 2.61<br>(2.17)            |
| 2               | <b>1.01</b><br>(0.11)      | 1.04<br>(0.23)      | 1.12<br>(0.42)      | 1.24<br>(0.57)     | 1.02<br>(0.15)      | 1.16<br>(0.46)      | 1.09<br>(0.33)      | 1.33<br>(0.65)            |
| $\delta = 1.1$  |                            |                     |                     |                    |                     |                     |                     |                           |
| 0               | <b>145.30</b><br>(560.06)  | 170.89<br>(448.18)  | 205.44<br>(375.70)  | 226.06<br>(362.58) | 153.80<br>(528.41)  | 208.71<br>(362.55)  | 171.55<br>(457.94)  | 225.10<br>(353.50)        |
| 0.1             | <b>181.27</b><br>(715.99)  | 204.24<br>(574.64)  | 237.14<br>(451.66)  | 255.64<br>(418.83) | 188.14<br>(678.23)  | 241.96<br>(443.78)  | 200.86<br>(510.67)  | 253.81<br>(412.22)        |
| 0.25            | <b>135.28</b><br>(613.78)  | 155.95<br>(460.25)  | 192.49<br>(430.16)  | 212.26<br>(378.96) | 138.84<br>(529.88)  | 199.44<br>(432.50)  | 160.49<br>(473.32)  | 213.75<br>(380.64)        |
| 0.5             | <b>22.43</b><br>(105.51)   | 36.71<br>(106.70)   | 55.97<br>(146.92)   | 77.67<br>(157.56)  | 22.47<br>(98.80)    | 61.37<br>(144.04)   | 38.45<br>(117.96)   | 81.85<br>(168.88)         |
| 1               | <b>2.65</b><br>(3.44)      | 3.91<br>(4.49)      | 5.65<br>(6.18)      | 7.94<br>(10.66)    | 2.88<br>(3.43)      | 5.94<br>(6.83)      | 4.07<br>(4.50)      | 8.87<br>(12.15)           |
| 1.5             | <b>1.21</b><br>(0.70)      | 1.48<br>(1.08)      | 1.96<br>(1.55)      | 2.36<br>(1.90)     | 1.30<br>(0.75)      | 2.01<br>(1.54)      | 1.65<br>(1.10)      | 2.58<br>(2.10)            |
| 2               | <b>1.01</b><br>(0.14)      | 1.06<br>(0.28)      | 1.16<br>(0.49)      | 1.29<br>(0.64)     | 1.03<br>(0.20)      | 1.19<br>(0.51)      | 1.12<br>(0.38)      | 1.37<br>(0.71)            |
| $\delta = 1.25$ |                            |                     |                     |                    |                     |                     |                     |                           |
| 0               | <b>31.44</b><br>(76.08)    | 43.70<br>(81.55)    | 62.13<br>(100.43)   | 77.47<br>(109.33)  | 33.71<br>(76.14)    | 65.48<br>(101.79)   | 42.57<br>(82.72)    | 79.15<br>(113.45)         |
| 0.1             | <b>35.27</b><br>(94.98)    | 49.35<br>(102.86)   | 69.84<br>(131.15)   | 86.15<br>(128.82)  | 37.95<br>(96.47)    | 72.65<br>(118.96)   | 47.74<br>(97.06)    | 87.52<br>(137.25)         |
| 0.25            | <b>31.19</b><br>(86.22)    | 43.49<br>(98.53)    | 61.21<br>(115.94)   | 77.40<br>(128.01)  | 32.97<br>(88.99)    | 64.22<br>(111.94)   | 41.88<br>(93.86)    | 78.30<br>(131.31)         |
| 0.5             | <b>13.52</b><br>(32.89)    | 19.51<br>(40.09)    | 28.50<br>(53.06)    | 38.21<br>(66.71)   | 14.20<br>(33.35)    | 30.34<br>(56.17)    | 18.90<br>(38.47)    | 39.40<br>(66.69)          |
| 1               | <b>2.65</b><br>(3.39)      | 3.73<br>(4.38)      | 5.18<br>(5.52)      | 6.73<br>(8.12)     | 2.79<br>(3.30)      | 5.25<br>(5.65)      | 3.73<br>(4.02)      | 7.26<br>(8.80)            |
| 1.5             | <b>1.28</b><br>(0.85)      | 1.56<br>(1.22)      | 2.00<br>(1.62)      | 2.38<br>(1.91)     | 1.35<br>(0.84)      | 2.05<br>(1.57)      | 1.69<br>(1.16)      | 2.56<br>(2.06)            |
| 2               | <b>1.03</b><br>(0.22)      | 1.09<br>(0.37)      | 1.21<br>(0.58)      | 1.35<br>(0.71)     | 1.05<br>(0.27)      | 1.24<br>(0.59)      | 1.16<br>(0.45)      | 1.43<br>(0.78)            |

Table S8: continued

| $\theta$       | TL                              |                  |                  |                  | DL                    |                  | EL               |                  |
|----------------|---------------------------------|------------------|------------------|------------------|-----------------------|------------------|------------------|------------------|
|                | $\lambda = 0.05$<br>$L = 0.648$ | 0.10             | 0.25             | 0.50             | 0.05                  | 0.25             | 0.05             | 0.25             |
| $\delta = 1.5$ |                                 |                  |                  |                  |                       |                  |                  |                  |
| 0              | <b>8.62</b><br>(13.64)          | 12.06<br>(16.07) | 16.44<br>(20.60) | 21.73<br>(27.15) | 8.67<br>(13.39)       | 17.13<br>(21.56) | 10.92<br>(15.23) | 22.45<br>(27.96) |
| 0.1            | <b>8.93</b><br>(14.45)          | 12.40<br>(17.15) | 17.15<br>(22.71) | 22.62<br>(29.14) | 9.06<br>(14.38)       | 17.95<br>(23.64) | 11.31<br>(16.35) | 23.41<br>(30.48) |
| 0.25           | <b>8.44</b><br>(13.64)          | 11.89<br>(16.98) | 16.25<br>(21.54) | 21.45<br>(28.51) | 8.51<br>(13.59)       | 17.02<br>(22.72) | 10.77<br>(15.60) | 22.01<br>(29.10) |
| 0.5            | <b>6.10</b><br>(9.83)           | 8.47<br>(11.88)  | 11.53<br>(14.62) | 14.85<br>(19.41) | 6.11<br>(9.41)        | 11.95<br>(15.87) | 7.73<br>(10.77)  | 15.24<br>(19.95) |
| 1              | <b>2.43</b><br>(2.92)           | 3.22<br>(3.60)   | 4.31<br>(4.36)   | 5.09<br>(5.05)   | 2.50<br>(2.77)        | 4.31<br>(4.35)   | 3.17<br>(3.19)   | 5.44<br>(5.65)   |
| 1.5            | <b>1.36</b><br>(1.00)           | 1.63<br>(1.34)   | 2.05<br>(1.69)   | 2.36<br>(1.86)   | 1.41<br>(0.98)        | 2.07<br>(1.60)   | 1.71<br>(1.20)   | 2.49<br>(1.96)   |
| 2              | <b>1.07</b><br>(0.35)           | 1.15<br>(0.51)   | 1.29<br>(0.72)   | 1.44<br>(0.82)   | 1.10<br>(0.39)        | 1.33<br>(0.71)   | 1.21<br>(0.54)   | 1.53<br>(0.89)   |
| $\delta = 2$   |                                 |                  |                  |                  |                       |                  |                  |                  |
| 0              | 2.90<br>(3.59)                  | 3.87<br>(4.44)   | 5.02<br>(4.96)   | 6.04<br>(5.96)   | <b>2.87</b><br>(3.28) | 5.02<br>(4.92)   | 3.56<br>(3.59)   | 6.33<br>(6.15)   |
| 0.1            | 2.92<br>(3.62)                  | 3.87<br>(4.46)   | 5.05<br>(5.04)   | 6.07<br>(6.08)   | <b>2.89</b><br>(3.31) | 5.05<br>(5.06)   | 3.57<br>(3.66)   | 6.36<br>(6.29)   |
| 0.25           | <b>2.77</b><br>(3.46)           | 3.73<br>(4.33)   | 4.88<br>(4.88)   | 5.87<br>(5.80)   | 2.84<br>(3.24)        | 4.90<br>(4.92)   | 3.51<br>(3.61)   | 6.15<br>(6.03)   |
| 0.5            | <b>2.55</b><br>(3.06)           | 3.35<br>(3.84)   | 4.35<br>(4.36)   | 5.17<br>(4.97)   | 2.56<br>(2.85)        | 4.34<br>(4.31)   | 3.16<br>(3.12)   | 5.51<br>(5.40)   |
| 1              | <b>1.87</b><br>(1.89)           | 2.32<br>(2.33)   | 2.99<br>(2.79)   | 3.42<br>(3.06)   | 1.89<br>(1.71)        | 2.97<br>(2.67)   | 2.28<br>(1.92)   | 3.57<br>(3.10)   |
| 1.5            | <b>1.39</b><br>(1.01)           | 1.62<br>(1.31)   | 1.96<br>(1.56)   | 2.22<br>(1.66)   | 1.43<br>(0.96)        | 1.96<br>(1.47)   | 1.66<br>(1.10)   | 2.29<br>(1.67)   |
| 2              | <b>1.13</b><br>(0.48)           | 1.23<br>(0.68)   | 1.42<br>(0.88)   | 1.56<br>(0.96)   | 1.16<br>(0.51)        | 1.44<br>(0.84)   | 1.30<br>(0.66)   | 1.63<br>(0.99)   |

Table S9: Performance of the TL, DL and EL control charts under the  $Gumbel(\theta, \delta)$  distribution with a steady-state UCL when  $m = 100$ ,  $n = 5$  and  $ARL_0 \approx 500$

| $\theta$        | TL                  |                     |                     |                    | DL                  |                     | EL                  |                    |
|-----------------|---------------------|---------------------|---------------------|--------------------|---------------------|---------------------|---------------------|--------------------|
|                 | $\lambda = 0.05$    | 0.10                | 0.25                | 0.50               | 0.05                | 0.25                | 0.05                | 0.25               |
|                 | $L = 0.500$         | 1.161               | 2.114               | 3.011              | 0.816               | 2.455               | 1.838               | 3.484              |
| $\delta = 1$    |                     |                     |                     |                    |                     |                     |                     |                    |
| 0               | 500.71<br>(1341.24) | 504.59<br>(1134.75) | 505.68<br>(918.42)  | 498.95<br>(774.37) | 494.20<br>(1239.40) | 502.62<br>(855.57)  | 497.25<br>(1080.90) | 490.52<br>(772.17) |
| 0.1             | 582.79<br>(1550.00) | 577.89<br>(1317.86) | 578.83<br>(1078.26) | 570.12<br>(934.00) | 577.13<br>(1462.33) | 569.41<br>(1022.89) | 579.31<br>(1280.24) | 558.79<br>(883.30) |
| 0.25            | 381.06<br>(1256.30) | 387.31<br>(1065.08) | 408.44<br>(889.25)  | 432.99<br>(792.95) | 381.46<br>(1195.02) | 418.21<br>(878.51)  | 393.47<br>(1050.94) | 437.25<br>(802.09) |
| 0.5             | 60.98<br>(264.26)   | 68.85<br>(281.18)   | 91.11<br>(258.14)   | 125.05<br>(258.72) | 58.94<br>(273.44)   | 98.92<br>(235.63)   | 71.04<br>(281.70)   | 135.57<br>(296.37) |
| 1               | 16.18<br>(4.05)     | 12.93<br>(4.27)     | 9.27<br>(6.34)      | 10.37<br>(13.89)   | 10.58<br>(4.07)     | 8.47<br>(7.97)      | 7.55<br>(5.41)      | 11.45<br>(16.63)   |
| 1.5             | 11.13<br>(1.80)     | 8.35<br>(1.63)      | 4.84<br>(1.38)      | 3.31<br>(1.72)     | 6.26<br>(1.57)      | 3.54<br>(1.43)      | 3.15<br>(1.56)      | 3.14<br>(2.22)     |
| 2               | 8.81<br>(1.05)      | 6.43<br>(0.90)      | 3.52<br>(0.69)      | 2.13<br>(0.61)     | 4.52<br>(0.84)      | 2.38<br>(0.63)      | 1.88<br>(0.77)      | 1.66<br>(0.79)     |
| $\delta = 1.1$  |                     |                     |                     |                    |                     |                     |                     |                    |
| 0               | 173.02<br>(495.93)  | 187.79<br>(416.98)  | 211.54<br>(357.49)  | 228.41<br>(352.88) | 171.95<br>(452.24)  | 214.78<br>(353.60)  | 184.10<br>(403.79)  | 225.39<br>(346.33) |
| 0.1             | 199.49<br>(590.21)  | 217.17<br>(516.00)  | 242.61<br>(426.71)  | 257.69<br>(410.01) | 204.08<br>(593.23)  | 246.67<br>(425.62)  | 211.92<br>(456.75)  | 253.37<br>(403.57) |
| 0.25            | 154.17<br>(486.55)  | 171.45<br>(431.43)  | 196.52<br>(407.94)  | 214.43<br>(370.80) | 154.41<br>(442.04)  | 204.20<br>(421.58)  | 168.34<br>(418.91)  | 213.75<br>(375.84) |
| 0.5             | 45.17<br>(85.93)    | 48.84<br>(100.10)   | 60.79<br>(139.02)   | 79.96<br>(157.95)  | 42.08<br>(105.78)   | 65.29<br>(141.72)   | 46.87<br>(107.04)   | 83.15<br>(167.49)  |
| 1               | 15.95<br>(4.14)     | 12.70<br>(4.34)     | 8.95<br>(5.88)      | 9.17<br>(11.14)    | 10.35<br>(4.10)     | 8.05<br>(7.03)      | 7.21<br>(5.26)      | 9.75<br>(12.04)    |
| 1.5             | 11.11<br>(1.81)     | 8.34<br>(1.66)      | 4.84<br>(1.42)      | 3.32<br>(1.76)     | 6.25<br>(1.60)      | 3.55<br>(1.47)      | 3.15<br>(1.60)      | 3.11<br>(2.15)     |
| 2               | 8.87<br>(1.07)      | 6.48<br>(0.93)      | 3.55<br>(0.71)      | 2.16<br>(0.66)     | 4.56<br>(0.88)      | 2.41<br>(0.67)      | 1.92<br>(0.81)      | 1.70<br>(0.83)     |
| $\delta = 1.25$ |                     |                     |                     |                    |                     |                     |                     |                    |
| 0               | 53.22<br>(64.51)    | 58.07<br>(80.33)    | 68.40<br>(97.94)    | 80.27<br>(108.63)  | 50.17<br>(69.74)    | 70.67<br>(102.09)   | 53.67<br>(82.34)    | 81.07<br>(115.14)  |
| 0.1             | 57.95<br>(84.19)    | 63.54<br>(95.27)    | 75.91<br>(126.18)   | 88.94<br>(127.96)  | 54.74<br>(85.77)    | 77.56<br>(118.32)   | 58.91<br>(93.47)    | 88.98<br>(134.65)  |
| 0.25            | 52.07<br>(79.87)    | 56.74<br>(92.56)    | 66.97<br>(114.68)   | 79.68<br>(126.99)  | 48.72<br>(84.42)    | 68.54<br>(11.93)    | 52.29<br>(93.74)    | 79.82<br>(130.59)  |
| 0.5             | 31.24<br>(32.76)    | 30.73<br>(42.74)    | 32.83<br>(52.84)    | 40.12<br>(66.58)   | 26.24<br>(34.71)    | 33.57<br>(55.89)    | 25.99<br>(41.50)    | 40.67<br>(66.26)   |
| 1               | 15.45<br>(4.05)     | 12.23<br>(4.12)     | 8.38<br>(5.01)      | 7.91<br>(8.18)     | 9.92<br>(3.97)      | 7.31<br>(5.80)      | 6.71<br>(4.95)      | 8.07<br>(8.80)     |
| 1.5             | 11.09<br>(1.85)     | 8.33<br>(1.69)      | 4.84<br>(1.47)      | 3.30<br>(1.74)     | 6.24<br>(1.65)      | 3.56<br>(1.52)      | 3.15<br>(1.65)      | 3.08<br>(2.12)     |
| 2               | 8.96<br>(1.11)      | 6.56<br>(0.98)      | 3.62<br>(0.77)      | 2.21<br>(0.72)     | 4.63<br>(0.92)      | 2.46<br>(0.73)      | 1.97<br>(0.86)      | 1.77<br>(0.89)     |

Table S9: continued

| $\theta$       | TL                              |                  |                  |                  | DL               |                  | EL               |                  |
|----------------|---------------------------------|------------------|------------------|------------------|------------------|------------------|------------------|------------------|
|                | $\lambda = 0.05$<br>$L = 0.500$ | 0.10             | 0.25             | 0.50             | 0.05             | 0.25             | 0.05             | 0.25             |
|                |                                 | 1.161            | 2.114            | 3.011            | 0.816            | 2.455            | 1.838            | 3.484            |
| $\delta = 1.5$ |                                 |                  |                  |                  |                  |                  |                  |                  |
| 0              | 24.70<br>(12.20)                | 22.23<br>(14.58) | 20.59<br>(20.27) | 23.56<br>(27.00) | 19.09<br>(13.08) | 20.12<br>(21.46) | 16.70<br>(15.98) | 23.90<br>(27.68) |
| 0.1            | 25.10<br>(13.13)                | 22.72<br>(15.78) | 21.27<br>(22.12) | 24.42<br>(29.08) | 19.51<br>(14.09) | 21.01<br>(23.54) | 17.23<br>(17.00) | 24.77<br>(30.29) |
| 0.25           | 24.41<br>(12.66)                | 22.02<br>(16.22) | 20.23<br>(20.95) | 23.14<br>(28.35) | 18.84<br>(14.28) | 19.93<br>(22.39) | 16.49<br>(16.56) | 23.27<br>(28.86) |
| 0.5            | 20.95<br>(9.22)                 | 18.00<br>(11.06) | 15.20<br>(15.56) | 16.29<br>(19.23) | 15.27<br>(9.87)  | 14.49<br>(16.19) | 12.41<br>(12.39) | 16.43<br>(19.83) |
| 1              | 14.45<br>(3.54)                 | 11.30<br>(3.51)  | 7.37<br>(3.76)   | 6.19<br>(4.93)   | 9.03<br>(3.41)   | 6.17<br>(4.20)   | 5.66<br>(3.88)   | 6.20<br>(5.62)   |
| 1.5            | 11.02<br>(1.86)                 | 8.26<br>(1.70)   | 4.80<br>(1.49)   | 3.27<br>(1.72)   | 6.18<br>(1.67)   | 3.54<br>(1.55)   | 3.12<br>(1.68)   | 2.98<br>(2.01)   |
| 2              | 9.08<br>(1.17)                  | 6.67<br>(1.06)   | 3.70<br>(0.85)   | 2.27<br>(0.83)   | 4.73<br>(1.01)   | 2.54<br>(0.82)   | 2.06<br>(0.95)   | 1.86<br>(0.98)   |
| $\delta = 2$   |                                 |                  |                  |                  |                  |                  |                  |                  |
| 0              | 15.49<br>(3.70)                 | 12.26<br>(3.67)  | 8.24<br>(4.32)   | 7.23<br>(5.84)   | 9.92<br>(3.67)   | 7.04<br>(4.73)   | 6.46<br>(4.22)   | 7.21<br>(6.14)   |
| 0.1            | 15.49<br>(3.74)                 | 12.24<br>(3.83)  | 8.26<br>(4.39)   | 7.25<br>(5.91)   | 9.93<br>(3.72)   | 7.05<br>(4.84)   | 6.45<br>(4.25)   | 7.23<br>(6.28)   |
| 0.25           | 15.33<br>(3.74)                 | 12.09<br>(3.80)  | 8.13<br>(4.34)   | 7.06<br>(5.76)   | 9.79<br>(3.72)   | 6.91<br>(4.77)   | 6.35<br>(4.26)   | 6.97<br>(5.84)   |
| 0.5            | 14.64<br>(3.43)                 | 11.48<br>(3.47)  | 7.50<br>(3.75)   | 6.36<br>(5.03)   | 9.18<br>(3.36)   | 6.31<br>(4.18)   | 5.76<br>(3.77)   | 6.28<br>(5.40)   |
| 1              | 12.62<br>(2.52)                 | 9.64<br>(2.40)   | 5.92<br>(2.38)   | 4.46<br>(2.97)   | 7.48<br>(2.38)   | 4.63<br>(2.53)   | 4.21<br>(2.57)   | 4.19<br>(3.16)   |
| 1.5            | 10.69<br>(1.76)                 | 7.99<br>(1.62)   | 4.63<br>(1.42)   | 3.09<br>(1.57)   | 5.93<br>(1.59)   | 3.37<br>(1.44)   | 2.93<br>(1.56)   | 2.74<br>(1.74)   |
| 2              | 9.24<br>(1.26)                  | 6.80<br>(1.14)   | 3.80<br>(0.95)   | 2.34<br>(0.95)   | 4.85<br>(1.10)   | 2.62<br>(0.94)   | 2.16<br>(1.05)   | 1.97<br>(1.10)   |
